# Supplementary material for: A systematic review of antibody mediated immunity to coronaviruses: antibody kinetics, correlates of protection, and association of antibody responses with severity of disease
Source: PubMed Central journal article supplement — medRxiv. 2020 Apr 17:2020.04.14.20065771. Preprint. [Version 1] doi: 10.1101/2020.04.14.20065771 (PMC7217088; doi:10.1101/2020.04.14.20065771), 2020-04-17

# **Supplementary Appendix**

## **Methods**

### **Data Abstraction**

#### *Antibody kinetics and association of antibody responses with clinical severity*

We shortlisted papers that met the following criteria for data digitization: (i) antibody responses were provided for at least two distinct points in time and were relative to a point of infection or symptoms onset; or (ii) explicitly discussed severity of symptoms in relation to antibody response. Data could consist of multiple measures of antibody kinetics: serological responses for individual patients (either quantified antibody levels or binary metric of seropositivity), and (cumulative) proportion of a group of patients that was seropositive or had seroconverted at different time points. Most studies used more than one assay and targeted more than one antibody; in these cases, we digitized all the data provided across assays and antibody types. For the pooled-analysis, we excluded studies that summarized antibody responses across patients, but we nonetheless discussed their main findings. Where possible, severity associated with different (groups of) patients were extracted, and standardized (Table S3). Finally, we also digitized cutoff points for the assays when given to define limits of detection or thresholds for positivity and refer to these as limits of detection. When not explicitly stated, but a category defined as less than some value exists, we assumed the value to be the limit of detection (e.g. cutoff of 1:10 is assumed when “<1:10” was present).

#### *Correlates of protection*

Studies on correlates of protection targeted for inclusion required a defined exposure, pre-existing antibody level (either antibody concentrations and/or serostatus) and outcomes as either virologically confirmed or serologically confirmed infection.

#### *Cross-protection and antigenic diversity*

Instances of human infections with a particular HCoV and titers against itself and the others were summarized. Acute, convalescent and fold rise in titers were digitized as brackets of possible values along with the number of individuals associated with those data points (e.g., a titer reported as 1:160 with the next serial dilution tested at 1:320 could take a value from 1:160 to 1:320). For MERS-CoV and SARS-CoV-1, acute titers were assumed to be the lowest reported in that study (either <1:10 or <1:20) as prior exposure was unlikely (Leung et al. 2006; Degnah et al. 2020). If not reported, fold rises were calculated using lower ends of both time points. If measurements included the lowest reported we assumed a titer of 5 to avoid having a zero as the denominator. All data points are accompanied by the type of test/assay performed.

#### *Population seroprevalence*

We determined papers which reported the number of positive tests out of the number sampled in at least two age groups in a population (by seroconversion with/without symptoms or PCR-confirmed symptomatic infections) if sampling was performed independently of symptoms.

Data extracted from text, tables, or figures includes: strain/virus tested for; whether seropositivity, seroconversion, or incidence was measured; time period of study for seroincidence studies; assay type; target antigen; cut-point for defining

seropositivity/seroconversion; bounds of age category; number of samples; number of positive samples. In plotting the data, if the upper bound of the highest age category could not be identified, we assumed it was 20 years above the lower bound based on inspection of the highest age categories in other studies.

For diagnostic serological assays and immunopathogenesis, we compiled and summarized findings from the categories without data extraction. Data extracted for correlates of protection and antigenic diversity were summarized and visualized without the attempt to draw a pooled conclusion.

**Supplementary Table 1. Summary of Serological Assays**

| Assay                                     | Antibody Class        | Description                                                                                                            | Antigen                            | Limitations/Comments                                                                                                                 |
|-------------------------------------------|-----------------------|------------------------------------------------------------------------------------------------------------------------|------------------------------------|--------------------------------------------------------------------------------------------------------------------------------------|
| Enzyme Linked Immunosorbent Assay (ELISA) | Detects IgG, IgM, IgA | Measures intensity of enzyme-mediated signal of antibody bound to viral antigen.                                       | Viral sub-component or whole virus | Seroconversion not until week 2. Useful for confirming cases that are PCR negative. Cross reactivity with respiratory coronaviruses  |
| Indirect Immunofluorescence Assay (IFA)   | Detects IgG, IgM, IgA | Measures fluorescent activity of antibody bound to viral antigen.                                                      | Viral sub-component or whole virus | Compares well with WB and Immunodot, but more expensive. Prone to subjective interpretation, requires BSL3                           |
| Western Blot (WB)                         | Detect IgG, IgM, IgA  | Measures presence of antibody-virus antigen complexes through size exclusion.                                          | Viral sub-component or whole virus | Useful for confirming cases. Synthetic peptides offer improved specificity. Also known as immunoblotting.                            |
| Complement fixation (CF)                  | Aggregate activity    | Measures inhibition of a fixed amount of complement to lyse cells by uptake of complement by antibody-virus complexes. | Whole virus                        | Human sera express an inhibitor mimicking some plaquing factors, leading to false positives. Antibody detected may be time dependent |
| Hemagglutination Inhibition (HI)          | Aggregate activity    | Measures interference of virus-red blood cell binding by antibody binding of virus.                                    | Whole virus                        | Potential for false positives. Relatively quick, simple, inexpensive.                                                                |
| Neutralization                            | Aggregate activity    | Measures ability of sera to inhibit viral entry and replication.                                                       | Whole virus                        | Gold standard and used often for confirmatory testing. Labor-intensive, expensive, requires BSL3                                     |

**Supplementary Table 2. Summary of studies on the kinetics of antibody immunity after infection, and for the association of antibody responses with disease severity.**

| PMID, Author, Year Published                     | Year of study | Country/Region                      | Study type           | Participants                                        | Virus     | Key findings                                                                                                                                                                                                                                                                                                                                                                                                                                                                                           |
|--------------------------------------------------|---------------|-------------------------------------|----------------------|-----------------------------------------------------|-----------|--------------------------------------------------------------------------------------------------------------------------------------------------------------------------------------------------------------------------------------------------------------------------------------------------------------------------------------------------------------------------------------------------------------------------------------------------------------------------------------------------------|
| <a href="#">6262459 Riski and Hovi, 1980</a>     | 1977 - 1980   | Finland                             | Prospective          | Patients with suspected viral infections (n=14,000) | HCoV-OC43 | <ul style="list-style-type: none"> <li>● Suggestive association between high titer to HCoV-OC43 and disease other than common cold, including pneumonia.</li> <li>● Patients with high or decreasing titer to HCoV-OC43 antibodies could also develop other diseases, including pneumonia.</li> </ul>                                                                                                                                                                                                  |
| <a href="#">6252244 Kraaijeveld et al., 1980</a> | Appx 1980     | United Kingdom                      | Challenge experiment | Adults (n=15)                                       | HCoV-229E | <ul style="list-style-type: none"> <li>● Significant antibody rises correlated well with symptoms, clinical score, and virus shedding.</li> </ul>                                                                                                                                                                                                                                                                                                                                                      |
| <a href="#">2170159 Callow et al., 1990</a>      | 1990          | United Kingdom                      | Challenge experiment | Adults (n=15)                                       | HCoV-229E | <ul style="list-style-type: none"> <li>● IgG and IgA antibody levels increased after day 8 in 10 infected individuals.</li> <li>● IgG and IgA peaked, on average, on day 14.</li> <li>● IgG and IgA waned but were detectable after 1 year.</li> </ul>                                                                                                                                                                                                                                                 |
| <a href="#">24896817 Azhar et al., 2014</a>      | 2013          | Saudi Arabia                        | Case report          | Confirmed case (n=1)                                | MERS-CoV  | <ul style="list-style-type: none"> <li>● First serum sample collected on day 1 was negative for MERS-CoV.</li> </ul>                                                                                                                                                                                                                                                                                                                                                                                   |
| <a href="#">31423970 Okba et al., 2019</a>       | 2013          | The Netherlands, Qatar, South Korea | Laboratory           | Serum from confirmed cases (n=11)                   | MERS-CoV  | <ul style="list-style-type: none"> <li>● Serum collected on day 14 detected MERS-CoV antibodies.</li> <li>● IgG antibodies were detectable and maintained in all severe (n=5) and most non-severe (n=6) cases, after one year, though some lacked detectable neutralizing antibodies.</li> <li>● Antibody responses tended to be higher among severe cases.</li> </ul>                                                                                                                                 |
| <a href="#">27192543 Alshukairi et al., 2016</a> | 2014          | Saudi Arabia                        | Retrospective        | Survived HCWs (n=9)                                 | MERS-CoV  | <ul style="list-style-type: none"> <li>● Antibodies detected at month 18 in 2 of 9 patients with severe symptoms.</li> <li>● More variable antibody longevity among patients with milder symptoms.</li> </ul>                                                                                                                                                                                                                                                                                          |
| <a href="#">25288266 Spanakis et al., 2014</a>   | 2014          | Greece                              | Case report          | Confirmed case (n=1)                                | MERS-CoV  | <ul style="list-style-type: none"> <li>● IgG titers peaked 3 weeks after onset of illness, and declined during weeks 4-5.</li> <li>● IgM titers remained consistently elevated during weeks 2-5.</li> </ul>                                                                                                                                                                                                                                                                                            |
| <a href="#">26583829 Park et al., 2015</a>       | 2015          | South Korea                         | Cross-sectional      | Confirmed cases (n=17)                              | MERS-CoV  | <ul style="list-style-type: none"> <li>● Robust antibody responses by week 3 of illness for most patients.</li> <li>● Delayed antibody responses with the neutralization test were associated with more severe disease.</li> </ul>                                                                                                                                                                                                                                                                     |
| <a href="#">27109133 Wang et al., 2016</a>       | 2015          | China                               | Retrospective        | Confirmed case (n=1; 52 close contacts)             | MERS-CoV  | <ul style="list-style-type: none"> <li>● IgM and IgG levels plateaued at day 15, and neutralizing antibody titer peaked during this time.</li> </ul>                                                                                                                                                                                                                                                                                                                                                   |
| <a href="#">28821364 Ko et al., 2017</a>         | 2015          | South Korea                         | Prospective          | Confirmed cases (n=42)                              | MERS-CoV  | <ul style="list-style-type: none"> <li>● No seroconversion among asymptomatic patients (n=3).</li> <li>● Seroconversion rate grew with increasing disease severity.</li> <li>● Symptomatic patients without pneumonia (n=10) had a robust increase in antibody titer by week 3.</li> <li>● Delayed rise in antibodies among patients with pneumonia that progressed to respiratory failure.</li> <li>● 75% of deceased patients did not seroconvert by week 3, compared to 0% of survivors.</li> </ul> |
| <a href="#">28585916 Choe et al., 2017</a>       | 2015          | South Korea                         | Prospective          | Confirmed cases (n=11)                              | MERS-CoV  | <ul style="list-style-type: none"> <li>● Severe cases tended to have higher antibody responses compared to mild cases.</li> </ul>                                                                                                                                                                                                                                                                                                                                                                      |

**Supplementary Table 2. Summary of studies on the kinetics of antibody immunity after infection, and for the association of antibody responses with disease severity.**

| PMID, Author, Year Published                       | Year of study | Country/Region | Study type      | Participants                                         | Virus                       | Key findings                                                                                                                                                                                                                                                                                                                                                                                                |
|----------------------------------------------------|---------------|----------------|-----------------|------------------------------------------------------|-----------------------------|-------------------------------------------------------------------------------------------------------------------------------------------------------------------------------------------------------------------------------------------------------------------------------------------------------------------------------------------------------------------------------------------------------------|
| <a href="#">30882305 Al-Abdely et al., 2019</a>    | 2015 - 2016   | Saudi Arabia   | Prospective     | Confirmed cases (n=33)                               | MERS-CoV                    | <ul style="list-style-type: none"> <li>• 5 of 5 patients with severe disease and 2 of 6 patients with mild disease, had detectable antibodies at year 1.</li> <li>• MERS antibodies decreased throughout the 6 months following disease onset.</li> <li>• Antibody titers in 4 of 6 mild cases were undetectable, even if most had pneumonia.</li> </ul>                                                    |
| <a href="#">31423971 Van Kerkhove et al., 2019</a> | 2015 - 2016   | Saudi Arabia   | Cross-sectional | Serum from confirmed cases (n=19)                    | MERS-CoV                    | <ul style="list-style-type: none"> <li>• Patients who died (n=6) exhibited robust neutralizing antibody responses by weeks 2-3, but these were Insufficient for recovery.</li> <li>• For all 9 of 19 cases for which a second sample was collected at month 5, IgG antibody levels had waned but were detectable.</li> </ul>                                                                                |
| <a href="#">14519257 Hsueh et al., 2003</a>        | 2003          | Taiwan         | Prospective     | Probable cases (n=7)                                 | SARS-CoV-1                  | <ul style="list-style-type: none"> <li>• IgG antibodies detected as early as by day 9 in all 6 patients that had detectable antibodies.</li> <li>• Elevated antibody levels lasted from month 1 up to &gt;2 months.</li> <li>• Antibody level plateaued in all patients during days 4-10.</li> <li>• An upsurge of antibody response was associated with the aggravation of respiratory failure.</li> </ul> |
| <a href="#">15030702 Wu et al., 2004</a>           | 2003          | Taiwan         | Laboratory      | Probable cases (n=138)                               | SARS-CoV-1                  | <ul style="list-style-type: none"> <li>• Antibodies during days 1-7 were detected in 10% (14 of 138) of probable patients.</li> <li>• Proportion of patients that tested positive was 50% at week 3, and peaked at over 70% at week 10.</li> </ul>                                                                                                                                                          |
| <a href="#">15031782 Chen et al., 2004</a>         | 2003          | China          | Prospective     | Probable cases (n=36)                                | SARS-CoV-1                  | <ul style="list-style-type: none"> <li>• Appearance of IgM and IgG ranged from 3-42 and 5-47 days, respectively.</li> <li>• 5.6% of probable infections were still positive for IgG, but negative for IgM up until day 60.</li> </ul>                                                                                                                                                                       |
| <a href="#">16173022 Tsao et al., 2005</a>         | 2003          | Taiwan         | Laboratory      | Probable cases (n=26)                                | SARS-CoV-1                  | <ul style="list-style-type: none"> <li>• Antibody titers in five patients were high after 100 days of disease onset.</li> </ul>                                                                                                                                                                                                                                                                             |
| <a href="#">16275947 Chan et al., 2005</a>         | 2003          | Hong Kong      | Prospective     | Confirmed cases (n=20)                               | SARS-CoV-1, HCoV-OC43, 229E | <ul style="list-style-type: none"> <li>• IgM still detectable in 8 of 11 patients at month 7.</li> <li>• IgGAM and IgG remained stable over the same period.</li> <li>• No significant difference in the kinetics of antibody responses between patients that survived or died.</li> </ul>                                                                                                                  |
| <a href="#">18466680 He et al., 2008</a>           | 2003          | China          | Laboratory      | Confirmed cases (n=22)                               | SARS-CoV-1                  | <ul style="list-style-type: none"> <li>• Most sera became positive by day 7.</li> <li>• Inconclusive for differences in antibody responses between recovered and died cases.</li> </ul>                                                                                                                                                                                                                     |
| <a href="#">17517191 Liao et al., 2007</a>         | 2003 - 2004   | China          | Retrospective   | Confirmed cases (n=18; including 4 reemerging cases) | SARS-CoV-1                  | <ul style="list-style-type: none"> <li>• Neutralizing antibody titers for 14 cases remained high between days 17-181.</li> <li>• Neutralizing antibody titers for all 4 reemerging SARS cases peaked within 11-13 days then rapidly dropped.</li> </ul>                                                                                                                                                     |
| <a href="#">17855683 Cao et al., 2007</a>          | 2003 - 2006   | China          | Prospective     | Confirmed cases (n=56)                               | SARS-CoV-1                  | <ul style="list-style-type: none"> <li>• Titers peaked at month 4.</li> <li>• 100% of participants were seropositive until month 16.</li> </ul>                                                                                                                                                                                                                                                             |

**Supplementary Table 2. Summary of studies on the kinetics of antibody immunity after infection, and for the association of antibody responses with disease severity.**

| PMID, Author, Year Published                | Year of study | Country/Region | Study type  | Participants                              | Virus      | Key findings                                                                                                                                                                                                                                                                                                                                                                                                                                                                                                                                                                                                                                                     |
|---------------------------------------------|---------------|----------------|-------------|-------------------------------------------|------------|------------------------------------------------------------------------------------------------------------------------------------------------------------------------------------------------------------------------------------------------------------------------------------------------------------------------------------------------------------------------------------------------------------------------------------------------------------------------------------------------------------------------------------------------------------------------------------------------------------------------------------------------------------------|
| <a href="#">15606632 Hsueh et al., 2004</a> | 2004          | Taiwan         | Laboratory  | Confirmed cases (n=30)                    | SARS-CoV-1 | <ul style="list-style-type: none"> <li>● IgG and neutralizing antibodies were undetectable in 19.4% and 11.1% of serum samples, respectively, at month 30, and in 25.8% and 16.1%, respectively, at month 36.</li> <li>● Patients with subsequent aseptic femoral neck necrosis had significantly lower neutralizing antibody levels than those without the sequela.</li> <li>● IgG, IgM, and IgA were detectable for at least 19 days.</li> <li>● On average it took 15 days for all three antibodies to peak.</li> <li>● Levels of IgA and IgM waned during weeks 3-4, remaining low on month 3.</li> <li>● IgG remained positive for &gt; 28 days.</li> </ul> |
| <a href="#">19396666 Yang et al., 2009</a>  | 2004 – 2006 ? | China          | Prospective | Confirmed cases (n=67)                    | SARS-CoV-1 | <ul style="list-style-type: none"> <li>● 7.7% of samples were positive for IgM after 1 week.</li> <li>● IgM antibodies peaked at month 1 and had a higher positive rate than IgG during this period, followed by a gradual decrease.</li> <li>● IgG levels peaked after week 25, and slowly declined but remained detectable at week 83.</li> </ul>                                                                                                                                                                                                                                                                                                              |
| <a href="#">21576510 Tang et al., 2011</a>  | 2020?         | China          | Prospective | Confirmed cases (n=23; 22 close contacts) | SARS-CoV-1 | <ul style="list-style-type: none"> <li>● 2 of 23 patients maintained low levels of IgG at year 6.</li> <li>● 1 patient's IgG antibodies were high after being discharged from the hospital, but decreased substantially by month 72.</li> <li>● Another patient's IgG antibody remained low but stable.</li> </ul>                                                                                                                                                                                                                                                                                                                                               |
| <a href="#">32065057 Zhang et al., 2020</a> | 2020          | China          | Laboratory  | Confirmed cases (n=16)                    | SARS-CoV-2 | <ul style="list-style-type: none"> <li>● Increase in antibodies was detected in nearly all patients by day 5.</li> <li>● 81% (13 of 16) of patients were IgM positive by day 5.</li> <li>● 100% (16 of 16) were IgG positive by day 5.</li> </ul>                                                                                                                                                                                                                                                                                                                                                                                                                |
| <a href="#">Zhao et al., 2020</a>           | 2020          | China          | Prospective | Confirmed cases (n=173)                   | SARS-CoV-2 | <ul style="list-style-type: none"> <li>● Antibody levels increased rapidly during the first 2 weeks.</li> <li>● Cumulative seroconversion reached 100% for IgG and neutralizing antibodies at around month 1.</li> <li>● Seroconversion of neutralizing antibodies was significantly quicker than that of IgM and IgG (possibly also due to the assay used).</li> </ul>                                                                                                                                                                                                                                                                                          |
| <a href="#">Tan et al., 2020</a>            | 2020          | China          | Prospective | Confirmed cases (n=67)                    | SARS-CoV-2 | <ul style="list-style-type: none"> <li>● Positive rate for IgM peaked at 57.1% by day 28, and declined to 33.3% at day 42.</li> <li>● Positive rate for IgG reached 74.3% by day 28 and increased to 86.7% at day 42.</li> <li>● Results suggest that antibody response may be associated with disease severity.</li> </ul>                                                                                                                                                                                                                                                                                                                                      |

**Supplementary Table 3. Severity ratings used in the studies, and the corresponding standardizations**

| PMIDs                                                                       | Severity rating used in study                       | Standardized rating <sup>1</sup> |
|-----------------------------------------------------------------------------|-----------------------------------------------------|----------------------------------|
| <a href="#">Kraaijeveld et al. 1980; Alshukairi et al. 2016</a>             | Asymptomatic                                        | Asymptomatic                     |
| <a href="#">Okba et al. 2019; Park et al. 2015; Kraaijeveld et al. 1980</a> | Mild                                                | Mild                             |
| <a href="#">Kraaijeveld et al. 1980</a>                                     | Moderate (HCoV-229E)                                |                                  |
| <a href="#">Abbasi et al. 2018</a>                                          | Group 1: Mild - no pneumonia                        |                                  |
| <a href="#">Alshukairi et al. 2016</a>                                      | Upper respiratory tract infection                   |                                  |
| <a href="#">Choe et al. 2017; Tan et al. 2020</a>                           | Non-severe                                          |                                  |
| <a href="#">Zhao et al. 2020</a>                                            | Non-critical                                        |                                  |
| <a href="#">Al-Abdely et al. 2019</a>                                       | Group 1: Received air throughout hospitalization    | Severe                           |
| <a href="#">Al-Abdely et al. 2019</a>                                       | Group 2: Required ventilator support and survived   |                                  |
| <a href="#">Al-Abdely et al. 2019</a>                                       | Group 3: Required ventilator support and died       |                                  |
| <a href="#">Abbasi et al. 2018</a>                                          | Group 2: Medium - pneumonia, no respiratory failure |                                  |
| <a href="#">Abbasi et al. 2018</a>                                          | Group 3: Severe - pneumonia and respiratory failure |                                  |
| <a href="#">Alshukairi et al. 2016</a>                                      | Severe pneumonia                                    |                                  |
| <a href="#">Okba et al. 2019; Choe et al. 2017; Tan et al. 2020</a>         | Severe                                              |                                  |
| <a href="#">Park et al. 2015</a>                                            | Severe, requiring supplemental oxygen therapy       |                                  |
| <a href="#">Park et al. 2015</a>                                            | Severe, requiring mechanical ventilation            |                                  |
| <a href="#">Zhao et al. 2020</a>                                            | Critical                                            |                                  |

<sup>1</sup> We define “mild” as symptomatic cases not requiring hospitalization, and “severe” as symptomatic cases requiring hospitalization. We necessarily made assumptions on what conditions may have likely required hospitalization, e.g., we assume a participant with pneumonia due to a viral infection (and who has been included in these studies) is more likely to have been hospitalized than not.

**Supplementary Table 4. Summary of studies on correlates of antibody immunity and protection against CoV infection.**

| PMID<br>Author and Year                          | Year of<br>study | Country/<br>Region | Study type                      | Participants                                                                    | Virus                   | Key findings                                                                                                                                                                                                                                                                                                                                                                                                                                                                                                                                                                                                                                                                                                                                                                                                                                                                                          |
|--------------------------------------------------|------------------|--------------------|---------------------------------|---------------------------------------------------------------------------------|-------------------------|-------------------------------------------------------------------------------------------------------------------------------------------------------------------------------------------------------------------------------------------------------------------------------------------------------------------------------------------------------------------------------------------------------------------------------------------------------------------------------------------------------------------------------------------------------------------------------------------------------------------------------------------------------------------------------------------------------------------------------------------------------------------------------------------------------------------------------------------------------------------------------------------------------|
| 2991366<br><a href="#">(Callow 1985)</a>         | NA               | UNITED<br>KINDOM   | Challenge<br>experiment         | Adults<br>(n=33)                                                                | HCoV-229E               | <ul style="list-style-type: none"> <li>• Individuals who seroconverted to 229E (defined as a 1.5 or higher rise in ELISA IgG serum antibodies) had significantly higher serum IgG and neutralizing antibodies as well as nasal IgA.</li> <li>• Serum and mucosal IgA were associated with the duration of viral shedding post experimental infection, with those shedding for 5 days or more having statistically significantly less mucosal IgA than those shedding less than 5 days (0.6 ng/ml versus 4.7 ng/ml, <math>p &lt; 0.01</math>).</li> <li>• Serum neutralizing antibody was not statistically significantly associated with the duration of viral shedding.</li> <li>• Protective associations of pre-infection serum neutralizing antibody, serum IgG and nasal IgA with clinical severity scores and nasal secretion weights (a measure of severity of rhinorrhea symptoms)</li> </ul> |
| 2170159<br><a href="#">Callow et al., 1990</a>   | NA               | United<br>Kingdom  | Challenge<br>experiment         | Adults<br>(n=15)                                                                | HCoV-229E               | <ul style="list-style-type: none"> <li>• Volunteers who were infected had lower pre-existing antibodies.</li> <li>• All 5 uninfected volunteers were infected and showed symptoms during the re-infection challenge one year later.</li> <li>• 6 of 9 infected volunteers were re-infected without developing into colds during the re-infection challenge one year later.</li> </ul>                                                                                                                                                                                                                                                                                                                                                                                                                                                                                                                 |
| 4626012<br><a href="#">Hamre and Beem, 1972</a>  | 1961-68          | United<br>States   | Prospective                     | Medical students<br>(n=12)                                                      | HCoV-229E               | <ul style="list-style-type: none"> <li>• 67% (8 of 12) of students with virus isolation had detectable pre-season neutralizing antibodies.</li> <li>• 25% (3 of 12) of medical students who seroconverted to 229E had detectable pre-season neutralizing antibodies.</li> <li>• Pre-season neutralizing antibody level inversely associated with the frequency of significant increase in neutralizing antibody titer after re-infection.</li> <li>• No association between pre-season neutralizing antibody and reinfection determined by CF seroconversion.</li> </ul>                                                                                                                                                                                                                                                                                                                              |
| 6262459<br><a href="#">Riski and Hovi, 1980</a>  | 1977-80          | Finland            | Prospective                     | Probable cases<br>(n=28)                                                        | HCoV-OC43               | <ul style="list-style-type: none"> <li>• Detectable pre-existing CF antibodies were found in 64% (18 of 28) of people who had common cold/pneumonia and increased CF antibodies.</li> <li>• Patients with high pre-existing antibodies or decreasing titer to OC43 antibodies could also develop other respiratory diseases, including pneumonia.</li> </ul>                                                                                                                                                                                                                                                                                                                                                                                                                                                                                                                                          |
| 18495857<br><a href="#">Dijkman et al., 2008</a> | 2004             | The<br>Netherlands | Prospective,<br>cross-sectional | Newborns and<br>children<br>(n=13 longitudinally;<br>139 cross-<br>sectionally) | HCoV-NL63,<br>HCoV-229E | <ul style="list-style-type: none"> <li>• All (n = 13) newborns had maternal antibodies to NL63 and 229E at birth, which disappeared within 3 months.</li> <li>• 53.8% and 13.4% of the newborns seroconverted to NL63 and 229E, respectively.</li> <li>• All newborns who later had seroconversion had low pre-infection antibodies.</li> <li>• 75% and 65.0% of the children aged 2.5 to 3.5 years were NL63 and 229E seropositive, respectively.</li> </ul>                                                                                                                                                                                                                                                                                                                                                                                                                                         |

**Supplementary Table 4. Summary of studies on correlates of antibody immunity and protection against CoV infection.**

| PMID<br>Author and Year | Year of<br>study | Country/<br>Region | Study type              | Participants     | Virus                   | Key findings                                                                                                                                                                                                                                                                                                                                                                                                                                                                                                                                                |
|-------------------------|------------------|--------------------|-------------------------|------------------|-------------------------|-------------------------------------------------------------------------------------------------------------------------------------------------------------------------------------------------------------------------------------------------------------------------------------------------------------------------------------------------------------------------------------------------------------------------------------------------------------------------------------------------------------------------------------------------------------|
| 6319590<br>Reed         | 1984             | United<br>Kingdom  | Challenge<br>experiment | Adults<br>(n=18) | HCoV-229E,<br>HCoV-OC43 | <ul style="list-style-type: none"> <li>● Re-challenged (n = 6) volunteers who had been experimentally infected 8-12 months previously. On the first challenge, all 6 developed symptoms and detectable virus and 5 of 6 experienced significant rise in titer. In the second season, 0/6 experienced illness, detectable virus or significant rise in titer.</li> <li>● Re-challenged (n=12) volunteers with heterologous virus (not identical to first experimental infection) 8-14 months after first infections. 7/12 developed cold symptoms</li> </ul> |
| Cohen                   | 1991             | United<br>Kingdom  | Challenge<br>experiment | Adults (n=54)    | HCoV-229E               | <ul style="list-style-type: none"> <li>● Challenge study focused on psychological-stress and its impact on response to experimental infection with coronavirus.</li> <li>● Suggested that serological status (having above or below median value) was associated with risk but lacks details broken out for just coronavirus.</li> </ul>                                                                                                                                                                                                                    |
| Barrow                  | 1990             | United<br>Kingdom  | Challenge<br>experiment | Adults (n=53)    | HCoV-229E               | <ul style="list-style-type: none"> <li>● Found lower proportions of individuals with high neutralizing titer experienced 'significant colds' upon viral challenge than individuals with low titer.</li> </ul>                                                                                                                                                                                                                                                                                                                                               |

**Supplementary Table 5. Summary of studies on antigenic diversity and cross-reactivity**

| Study                                      | Year of study        | Country/<br>Region                 | Study type                                               | Participants                                                                                                                                    | Viruses/assay                                                                                            | Key findings                                                                                                                                                                                                                                                                                                                                                                                                                                                                                                                                                                                                                                                            |
|--------------------------------------------|----------------------|------------------------------------|----------------------------------------------------------|-------------------------------------------------------------------------------------------------------------------------------------------------|----------------------------------------------------------------------------------------------------------|-------------------------------------------------------------------------------------------------------------------------------------------------------------------------------------------------------------------------------------------------------------------------------------------------------------------------------------------------------------------------------------------------------------------------------------------------------------------------------------------------------------------------------------------------------------------------------------------------------------------------------------------------------------------------|
| <a href="#">Bradburne 1970</a>             | 1970                 | United Kingdom                     | Human challenge study                                    | volunteers challenged with LP (n=18), 229E (n=20), B814 (n=10), OC43 (n=OC43)                                                                   | HCoV-229E, LP, B814, OC43, neutralization test                                                           | <ul style="list-style-type: none"> <li>Volunteers inoculated with LP (n=16/18) or 229E (20/20) experienced a <math>\geq 4</math>-fold rise in neutralizing antibodies to both viruses.</li> <li>Individuals inoculated with B814 (n=0/10) or OC43 (n=1/14) did not have a <math>\geq 4</math>-fold rise to 229E or LP.</li> </ul>                                                                                                                                                                                                                                                                                                                                       |
| <a href="#">Kaye, Ong, and Dowdle 1972</a> | 1965-1972            | United States                      | Paired serum in a longitudinal survey of children (=104) | Paired serum in a longitudinal survey of children (=104)                                                                                        | HCoV-OC43, -229E, hemagglutination assay                                                                 | <ul style="list-style-type: none"> <li>Of 104 paired serum of children in a longitudinal survey which showed 4-fold seroconversions by indirect hemagglutination assay (IHA), 41 were risen to only HCoV-OC43, 62 to only -229E, and only one that was risen to both.</li> </ul>                                                                                                                                                                                                                                                                                                                                                                                        |
| <a href="#">(Reed 1984)</a>                | 1974-1976; 1971-1981 | United Kingdom                     | <i>In vitro and human challenge study</i>                | Volunteers 18-50 yo (n=18) challenged at approximately one-year with the exact homologous strain                                                | HCoV-229E, LP, and 229E-like strains, -OC43 and related strains                                          | <ul style="list-style-type: none"> <li>Recent HCoV-OC43-like strains caused different disease manifestations from -229E-like strains did not induce a rise in antibodies (neutralization or HI) to -229E-like viruses or -OC43.</li> <li>Endemic circulation of HCoV-229E resulted in higher pre-inoculation neutralizing antibodies of new participants against a lab adapted 229E-like strain and decreased clinical disease.</li> <li>Study participants (n=18) challenged at approximately one-year with the exact homologous strain (6/6) were protected, while 7/12 challenged with a heterologous 229E-like strain developed symptoms and shed virus.</li> </ul> |
| <a href="#">Dijkman et al. 2008</a>        | 1999-2003            | The Netherlands                    | Longitudinal serological study                           | Children born to HIV 1 positive mothers (n=13)                                                                                                  | HCoV-NL63 and -229E, ELISA                                                                               | <ul style="list-style-type: none"> <li>Longevity of anti-coronavirus antibodies in newborns and cross reactivity. Did not find cross-reactivity between HCoV-NL63 N-direct antibodies and -229E N-direct antibodies.</li> </ul>                                                                                                                                                                                                                                                                                                                                                                                                                                         |
| <a href="#">Dijkman et al. 2012</a>        | 1993-2012            | The Netherlands and United Kingdom | Serological Survey                                       | (n=12 males and n=13 females) born to HIV 1 positive mothers (NL63 and 229E in infants followed 20 months (n=25)) hospitalized infants (n=1471) | ELISA to N protein, NL63 and 229E in infants followed 20 months (n=25) and hospitalized infants (n=1471) | <ul style="list-style-type: none"> <li>Anti-HCoV-NL63 neutralizing antibodies against the spike protein may partially protect against HCoV-229E but not the vice versa. This is also the case for antibodies to HCoV-OC43 and protection against HCoV-HKU1. This may also account for the higher frequency of</li> </ul>                                                                                                                                                                                                                                                                                                                                                |

|                                       |           |               |                                                               |                                                                                                                                                                        |                                                                     |                                                                                                                                                                                                                                                                                                                                                                                                                                                                                                                                                                                                                                                                                                 |
|---------------------------------------|-----------|---------------|---------------------------------------------------------------|------------------------------------------------------------------------------------------------------------------------------------------------------------------------|---------------------------------------------------------------------|-------------------------------------------------------------------------------------------------------------------------------------------------------------------------------------------------------------------------------------------------------------------------------------------------------------------------------------------------------------------------------------------------------------------------------------------------------------------------------------------------------------------------------------------------------------------------------------------------------------------------------------------------------------------------------------------------|
| <a href="#">(Lehmann et al. 2008)</a> | 2008      | Germany       | Serological Assay                                             | Acute and convalescent sera (n=6 HCoV-OC43 infection, n=6 HCoV-229E infection)<br>n=25 healthy donor sera<br>n=49 sera from convalescent SARS sera                     | HCoV-229E, OC43, HKU1, NL63, SARS-CoV-1, developed line immunoassay | <p>HCoV-OC43 and -NL63 among hospitalized infants.</p> <ul style="list-style-type: none"> <li>Supports cross-reactivity among endemic strains within alpha- and beta-CoVs, but not with SARS-CoV-1 N protein.</li> </ul>                                                                                                                                                                                                                                                                                                                                                                                                                                                                        |
| <a href="#">(Haynes et al. 2007)</a>  | 2007      | United States | Comparison of serological assay detection of N and S proteins | Baby hamster kidney and n=61 patients from Vietnam and Taiwan<br>SARS-CoV-1 positive                                                                                   | SARS-CoV-1, ELISA                                                   | <ul style="list-style-type: none"> <li>Found false-positive to SARS N/S recombinant ELISA but unknown whether it is due to cross-reactivity with other CoVs or are they just nonspecific reactivity.</li> </ul>                                                                                                                                                                                                                                                                                                                                                                                                                                                                                 |
| <a href="#">(Che et al. 2005)</a>     | 2003-2005 | China         | Serological study                                             | n=11 paired serum samples from patients with SARS-CoV-1, n=100 random samples were collected from healthy adult donors, n=34 SARS-CoV-1 patients 8-81 days after onset | SARS-CoV-1, IFA, Western Blot, ELISA                                | <ul style="list-style-type: none"> <li>Only 2/100 healthy donor samples had SARS-CoV nucleocapsid reactivity, as compared to 97% with positivity to HCoV-229E and 99% positivity to HCoV-OC43.</li> <li>SARS patients (n=34) had strong reactivity to nucleocapsid from HCoV-229E (97%), HCoV-OC43 (100%) and SARS-CoV (100%). Similar trends were observed when instead the samples were tested by IgG responses to CoV-infected cells.</li> <li>10/11 SARS patients showed &gt;=4-fold rise to HCoV-OC43 and 5/11 to 229E by IFA in paired acute/convalescent samples, but more limited seroconversion to the nucleocapsid of -229E (2/11) and -OC43 (0/11).</li> </ul>                       |
| <a href="#">(Chan et al. 2013)</a>    | 2013      | Hong Kong     | Serological study                                             | Animal handlers (n=94), SARS-CoV-1 patients (n=28), healthy blood donors (n=152)                                                                                       | SARS-CoV-1, IF and neutralization                                   | <ul style="list-style-type: none"> <li>100% of SARS-CoV-1 patients had IF titers &gt;1:10 and 96.4% had neutralizing titers &gt;1:10 against SARS-CoV-1, while 60.7% had IF titers and 25% had neutralizing antibodies to MERS-CoV.</li> <li>The proportion of cross-reactivity was lower for animal handlers at high risk of exposure to SARS-like CoVs (SARS-CoV: 13.8% IF &gt;1:10, 4.3% with NT &gt;1:10; MERS-CoV: 2.2% IF &gt;1:10, 0% NT &gt;1:10).</li> <li>None of the healthy donors had any reactivity to either MERS-CoV or SARS-CoV-1.</li> <li>Among animal handlers and SARS patients with positivity to MERS-CoV by IF, 7/19 had NT to MERS-CoV. All had high levels</li> </ul> |

|                                     |           |               |                          |                                                                                                               |                                                                                                     |                                                                                                                                                                                                                                                                                                                                                                                                                                                                                                                                                                                                                                                                                                                                                                                                                                                                     |
|-------------------------------------|-----------|---------------|--------------------------|---------------------------------------------------------------------------------------------------------------|-----------------------------------------------------------------------------------------------------|---------------------------------------------------------------------------------------------------------------------------------------------------------------------------------------------------------------------------------------------------------------------------------------------------------------------------------------------------------------------------------------------------------------------------------------------------------------------------------------------------------------------------------------------------------------------------------------------------------------------------------------------------------------------------------------------------------------------------------------------------------------------------------------------------------------------------------------------------------------------|
| <a href="#">(Chan et al. 2005)</a>  | 2003-2005 | Hong Kong     | Serological cohort study | n=20 SARS-CoV-1 patients in the first month of illness. Patients who survived (n=14), patients who died (n=6) | SARS-CoV-1, HCoV-229E, -OC43, -NL63, IFA and neutralization                                         | <p>of NT to OC43. SARS-CoV-1 patients with paired acute/convalescent sera (n=4) experienced seroconversion by (IF and NT) to SARS-CoV; some had positivity by IF to MERS-CoV in either acute (n=1) or convalescent (n=2) samples. All showed &gt;2-fold rise to betacoronavirus OC43 by IF, while only 1 seroconverted to alpha coronaviruses 229E and NL63 by IF.</p> <ul style="list-style-type: none"> <li>• Infections with HCoV-OC43 and HCoV-229E did not lead to antibodies (acute or convalescent phase) against SARS-CoV by IFA or neutralization.</li> <li>• Total Ig (IgG, IgA, and IgM) and IgG to endemic HCoVs (-229E, -OC43) measured by IF showed a 4-fold rise after SARS-CoV-1 infection in 12/20 patients. A subset also had a rise in antibodies to NL63.</li> <li>• Neutralization titers to SARS-CoV remained stable for 7 months.</li> </ul> |
| <a href="#">(Fung and Liu 2019)</a> | 2019      | China         | Review                   | Vaires                                                                                                        | Human coronaviruses, various                                                                        | <ul style="list-style-type: none"> <li>• Review study of of human coronavirus pathogenesis</li> </ul>                                                                                                                                                                                                                                                                                                                                                                                                                                                                                                                                                                                                                                                                                                                                                               |
| <a href="#">(Zhong et al. 2005)</a> | 2003-2005 | China         | Serological cohort study | n=40 patients who recovered from SARS-CoV-1 1 month after discharge (20-65 yo)                                | SARS-CoV-1, ELISA, Western Blot                                                                     | <ul style="list-style-type: none"> <li>• While most neutralizing antibodies against CoVs target epitopes in the S1 region, the only identified surface immunodominant site in a study identifying immunogenic epitopes from convalescent samples of twenty SARS survivors through biopanning against phage display dodecapeptide library resides in the S2 domain.</li> </ul>                                                                                                                                                                                                                                                                                                                                                                                                                                                                                       |
| <a href="#">(Cui et al. 2019)</a>   | 2019      | United States | Review                   | Varies                                                                                                        | Human coronaviruses                                                                                 | <ul style="list-style-type: none"> <li>• Review on coronavirus evolutionary history</li> </ul>                                                                                                                                                                                                                                                                                                                                                                                                                                                                                                                                                                                                                                                                                                                                                                      |
| <a href="#">(Ren et al. 2003)</a>   | 2003      | China         | Serological study        | SARS-CoV-1 sera (n=4)<br>Healthy sera (n=2)                                                                   | SARS-CoV-1, ELISA                                                                                   | <ul style="list-style-type: none"> <li>• Characterized antigenic regions on recombinant S1 and S2 protein by Western Blot and ELISA</li> </ul>                                                                                                                                                                                                                                                                                                                                                                                                                                                                                                                                                                                                                                                                                                                      |
| <a href="#">(Bisht et al. 2004)</a> | 2004      | United States | Mouse challenge study    | 2 groups of 8 BALBc mice 0-4 weeks received MVA/S or MVA i.m.                                                 | Attenuated modified vaccinia virus Ankara (MVA) and SARS-CoV-1, Western Blot, ELISA, neutralization | <ul style="list-style-type: none"> <li>• Characterization of the SARS-CoV S protein</li> </ul>                                                                                                                                                                                                                                                                                                                                                                                                                                                                                                                                                                                                                                                                                                                                                                      |

|                                       |           |                         |                                      |                                                                         |                                                                                  |                                                                                                                                                                                                                                                                                                                                                                                                                                                                                                                                                                                                                                                                                                                                                                                                                                                                                                          |
|---------------------------------------|-----------|-------------------------|--------------------------------------|-------------------------------------------------------------------------|----------------------------------------------------------------------------------|----------------------------------------------------------------------------------------------------------------------------------------------------------------------------------------------------------------------------------------------------------------------------------------------------------------------------------------------------------------------------------------------------------------------------------------------------------------------------------------------------------------------------------------------------------------------------------------------------------------------------------------------------------------------------------------------------------------------------------------------------------------------------------------------------------------------------------------------------------------------------------------------------------|
| <a href="#">(Wang et al. 2005)</a>    | 2005      | Taiwan                  | ADE and cell infectivity study       | Anti-SARS-CoV-1 sera were collected from SARS-CoV-1 patients            | Immunoblotting and RT PCR                                                        | <ul style="list-style-type: none"> <li>Investigated the timing of IgG reactivity up to and after 3 weeks demonstrated stronger immunogenicity/antigenicity of N and S3 protein compared to S1 and S2.</li> </ul>                                                                                                                                                                                                                                                                                                                                                                                                                                                                                                                                                                                                                                                                                         |
| <a href="#">(Meyer et al. 2014)</a>   | 2014      | Germany                 | Serological assay development Review | Varies                                                                  | HCoV-229E, -NL63, OC43, HKU1, SARS-CoV-1, MERS-CoV, IFA, ELISA, Western Blot     | <ul style="list-style-type: none"> <li>Review of serological assays for SARS-CoV-1, MERS-CoV, and newly emerging CoVs</li> </ul>                                                                                                                                                                                                                                                                                                                                                                                                                                                                                                                                                                                                                                                                                                                                                                         |
| <a href="#">(Patrick et al. 2006)</a> | 2003-2006 | Canada                  | Serological study                    | n=95/142 residents<br>n=53/160 staff experienced symptoms of SARS-CoV-1 | SARS-CoV-1, RT PCR, IFA, ELISA, neutralization, Western Blot, Euroimmun indirect | <ul style="list-style-type: none"> <li>A study screening 220 ten amino acid peptides covering the full length of HCoV-OC43 N protein (with eight residues running overlaps) and 207 peptides of SARS-CoV-1 N revealed four sites with shared homology</li> <li>The study was conducted to explain false-positives to SARS-CoV-1 in multiple assays. Supported by non-seroconversion in the neutralization assay and RT-PCR positive results for HCoV-OC43, these were likely HCoV-OC43 infections with cross-reactive results driven by these potentially cross-reactive sites.</li> </ul>                                                                                                                                                                                                                                                                                                               |
| <a href="#">(Du et al. 2013)</a>      | 2013      | United States and China | Serological study                    | SARS-CoV-1 S-RBD protein-vaccinated mice                                | SARS-CoV-1, neutralization                                                       | <ul style="list-style-type: none"> <li>Find whether the cross-reactivity between SARS-CoV and MERS-CoV was due to antibodies targeting the RBD. They found monoclonal antibodies raised to SARS-CoV RBD did not bind the MERS-CoV RBD even at high concentrations (10ug/mL) and all had low or no neutralizing activity against MERS-CoV pseudoviruses.</li> <li>There is an absence of cross-neutralization of MERS-CoV isolates by antiserum to S glycoprotein HKU 4 or 5 (animal CoVs in the same subgroup). For SARS-CoV, there is also an absence of cross-neutralization by antiserum to HKU 3 and BtCoV 279 S glycoprotein.</li> <li>Between SARS-CoV and MERS-CoV, all mAbs generated that have high affinity to conformational or linear epitopes in the RBD of SARS-CoV does not neutralize nor bind to the RBD and S1 proteins of MERS-CoV even at high concentrations (10 mg/ml).</li> </ul> |

|                                          |           |                           |                                           |                                                                                                                                                                                            |                                                                                     |                                                                                                                                                                                                                                                                                                                                                                                                                                                                                                                                                                                                                                                                                                                                                                                                                                                                                                                                                                                                                                                                                                                                                                                                                                                                                                                                                                                                                                                                                                                                                                                                                                                                                                                                                                                                                  |
|------------------------------------------|-----------|---------------------------|-------------------------------------------|--------------------------------------------------------------------------------------------------------------------------------------------------------------------------------------------|-------------------------------------------------------------------------------------|------------------------------------------------------------------------------------------------------------------------------------------------------------------------------------------------------------------------------------------------------------------------------------------------------------------------------------------------------------------------------------------------------------------------------------------------------------------------------------------------------------------------------------------------------------------------------------------------------------------------------------------------------------------------------------------------------------------------------------------------------------------------------------------------------------------------------------------------------------------------------------------------------------------------------------------------------------------------------------------------------------------------------------------------------------------------------------------------------------------------------------------------------------------------------------------------------------------------------------------------------------------------------------------------------------------------------------------------------------------------------------------------------------------------------------------------------------------------------------------------------------------------------------------------------------------------------------------------------------------------------------------------------------------------------------------------------------------------------------------------------------------------------------------------------------------|
| <a href="#">(Aburizaiza et al. 2014)</a> | 2012      | Saudi Arabia              | Serological study                         | healthy individuals (n=130)<br>slaughterhouse workers (n=226)                                                                                                                              | MERS-CoV, IFA and neutralization                                                    | <ul style="list-style-type: none"> <li>None of the healthy individuals had IFA positivity to MERS-CoV, while 8/226 slaughterhouse workers had some cross-reactivity by IFA to MERS-CoV and 2 had reactivity to the MERS-CoV spike protein, as well as some reactivity to 229E, NL63, OC43 and/or HKU1 in immunofluorescence assay (IFA). None had a response to the SARS-CoV spike protein, although, antisera from confirmed MERS patients in Germany high PRNT90 titers (1:320 and 1:640) to MERS-CoV showed slight cross-reactivity with SARS-CoV-1 by IFA.</li> <li>Low positivity among healthy blood donors (10/4719 tested, n individuals ages 19-88 years), contacts of confirmed MERS patients (1/135 tested, 14-49 years; mean age 31 years), while 3/4 confirmed MERS cases were positive (30-70 years; mean age 52), but random testing of the blood donors using an IgM assay revealed some false negative results, suggesting the assay was underestimated prevalence. Blood donors that were positive and negative for MERS antibodies had high prevalence of antibodies to HCoV-229E, -NL63, -OC43, and -HKU1.</li> <li>Reactivity of human positive control antisera to each of the various strains (HCoV-NL63, -229E, -OC43, -HKU1, SARS-CoV-1, MERS-CoV) as well as antiserum to EV68 as negative control were measured against nucleocapsid (N) of these strains across a gradient of concentrations. SARS-CoV-1 showed no cross-reactivity. Comparing the reactivity patterns, HCoV-HKU-1 appeared antigenically close to -OC43, and -229E appeared close to -NL63, but the distance was non-symmetric.</li> <li>Measured the mean fluorescent intensity (MFI) of reactions between positive control sera and recombinant N of those strains. Group 1 HCoVs (alpha-HCoV-229E and</li> </ul> |
| <a href="#">(Al Kahlout et al. 2019)</a> | 2012-2016 | Qatar                     | Serological Study                         | 4858 plasma samples (n=4719 blood donors 19-88yo), (n=135 close contacts to 4 confirmed cases 14-49 yo), (n=4 confirmed patients 30-70yo)                                                  | recombinant S1 protein IgG ELISA kit                                                |                                                                                                                                                                                                                                                                                                                                                                                                                                                                                                                                                                                                                                                                                                                                                                                                                                                                                                                                                                                                                                                                                                                                                                                                                                                                                                                                                                                                                                                                                                                                                                                                                                                                                                                                                                                                                  |
| <a href="#">(Gao et al. 2015)</a>        | 2015      | Turkey and United Kingdom | Seroprevalence study                      | n=695 healthy adults and n=492 healthy children for seroprevalence and to test the relationship between anti-N-IgG and HCoV infection n=361 serum samples from children with LRI were used | HCoV-229E, -NL63, -OC43, -HKU1, SARS-CoV-1, and MERS-CoV<br><br>Western Blot, ELISA |                                                                                                                                                                                                                                                                                                                                                                                                                                                                                                                                                                                                                                                                                                                                                                                                                                                                                                                                                                                                                                                                                                                                                                                                                                                                                                                                                                                                                                                                                                                                                                                                                                                                                                                                                                                                                  |
| <a href="#">(Trivedi et al. 2019)</a>    | 2019      | United States             | Development and Evaluation of Immunoassay | Positive for HCoV-229E (n=4), HCoV-NL63 (n=9), HCoV-OC43 (n=21), HCoV-HKU1 (n=14), SARS-CoV-1 (n=5), MERS-CoV (n=7)                                                                        | HCoV-229E, HCoV-NL63, HCoV-OC43, HCoV-HKU1, SARS-CoV-1, MERS-CoV, RT                |                                                                                                                                                                                                                                                                                                                                                                                                                                                                                                                                                                                                                                                                                                                                                                                                                                                                                                                                                                                                                                                                                                                                                                                                                                                                                                                                                                                                                                                                                                                                                                                                                                                                                                                                                                                                                  |

|                                           |           |                |                                          |                                                                                                                |                                               |                                                                                                                                                                                                                                                                                                                                                                                                                                                                                                                                                                                                                                                                                                                                                                                                                                                                                                                                                                                                  |
|-------------------------------------------|-----------|----------------|------------------------------------------|----------------------------------------------------------------------------------------------------------------|-----------------------------------------------|--------------------------------------------------------------------------------------------------------------------------------------------------------------------------------------------------------------------------------------------------------------------------------------------------------------------------------------------------------------------------------------------------------------------------------------------------------------------------------------------------------------------------------------------------------------------------------------------------------------------------------------------------------------------------------------------------------------------------------------------------------------------------------------------------------------------------------------------------------------------------------------------------------------------------------------------------------------------------------------------------|
|                                           |           |                |                                          |                                                                                                                | PCR, ELISA, multiplex immunoassay             | -NL63) cross-reacted with other group 1 CoVs but did not cross-react with strains from group 2 (beta-HCoV-OC43 and -HKU1). Antiserum against SARS-CoV-1 (from group 2b) reacted with HCoV-229E and -NL63. Antiserum against HCoV-OC43 (from group 2a) reacted with -HKU1 (also in 2a). Antiserum against MERS-CoV (group 2c) reacted with HCoV-HKU1.                                                                                                                                                                                                                                                                                                                                                                                                                                                                                                                                                                                                                                             |
| <a href="#">(Agnihothram et al. 2014)</a> | 2012-2014 | United Kingdom | Serological Study                        | MERS-CoV was isolated from a 49yo patient                                                                      | MERS-CoV, ELISA, neutralization               | <ul style="list-style-type: none"> <li>Antiserum against MERS-CoV (group 2c) reacted with HCoV-HKU1 were consistent with cross-reactivity of epitopes in the N protein between subgroups but not between those observed in polyclonal sera generated through mice immunization.</li> <li>It is unclear how much of the in vitro fitness and plaque morphology differences can be attributed to the antigenic differences observed between strains.</li> <li>Examined cross-reactivity (binding by ELISA and Western Blot) among CoV N proteins between SARS-CoV-1 N and animal CoV N proteins (porcine CoVs gastroenteritis CoV [TGEV] and porcine respiratory CoV [PRCV], feline infectious peritonitis virus [FIPV], and canine CoVs).</li> <li>Found cross-binding by serum from SARS patients against SARS-CoV-1 and porcine CoVs N protein sites while healthy human samples showed no binding to SARS-CoV porcine CoV N proteins. Both groups had high reactivity to HCoV-NL63.</li> </ul> |
| <a href="#">(Vlasova et al. 2007)</a>     | 2007      | United States  | Serological study and protein reactivity | SARS patients (n=6, convalescent samples collected 18-50 days post-symptom onset) healthy human samples (n=24) | SARS-CoV-1, s, HCoV-NL63, ELISA, Western Blot |                                                                                                                                                                                                                                                                                                                                                                                                                                                                                                                                                                                                                                                                                                                                                                                                                                                                                                                                                                                                  |

|                                     |           |                   |                             |                                                                                                                                                                                              |                                                                           |                                                                                                                                                                                                                                                                                                                                                                                                                                                                                                                                                                                                                                                                                                                                                                                                                                                                                                                                                                                                                                                                                                                                                                                                                                                                                                                                                                                                                                                                                                                                                                                                                                                                                                                                                                                                    |
|-------------------------------------|-----------|-------------------|-----------------------------|----------------------------------------------------------------------------------------------------------------------------------------------------------------------------------------------|---------------------------------------------------------------------------|----------------------------------------------------------------------------------------------------------------------------------------------------------------------------------------------------------------------------------------------------------------------------------------------------------------------------------------------------------------------------------------------------------------------------------------------------------------------------------------------------------------------------------------------------------------------------------------------------------------------------------------------------------------------------------------------------------------------------------------------------------------------------------------------------------------------------------------------------------------------------------------------------------------------------------------------------------------------------------------------------------------------------------------------------------------------------------------------------------------------------------------------------------------------------------------------------------------------------------------------------------------------------------------------------------------------------------------------------------------------------------------------------------------------------------------------------------------------------------------------------------------------------------------------------------------------------------------------------------------------------------------------------------------------------------------------------------------------------------------------------------------------------------------------------|
| <a href="#">(Yu et al. 2005)</a>    | 2003-2005 | Japan and Vietnam | Serological study           | n=149 healthcare workers, 37 probable SARS-CoV-1 cases<br>n=175 healthy volunteers                                                                                                           | SARS-CoV-1, ELISA, Western Blot, neutralization                           | <ul style="list-style-type: none"> <li>• Showed nonspecific reaction to N protein by ELISA was reduced through the use of N constructs with 121 amino acid deletions at the N-terminus compared to four residue deletions.</li> <li>• When tested against sera from healthy volunteers and SARS-CoV-1 patients in Vietnam, the resulting titers were higher than that of SARS-CoV-1-infected cell lysate-based ELISA. Of those include four inapparent SARS-CoV-1 infections confirmed by virus neutralization.</li> <li>• Explored recombinant S and N protein as diagnostic tools for identifying SARS-CoV-1 patients and found an ELISA testing positivity to a truncated S-N protein (N321-422 and S264-680) proteins from SARS-CoV could discriminate between SARS-CoV-1 patients and healthy donors, nearly as well as SARS-CoV-1 lysate and better than S or N alone. SARS-CoV-1 patients showed more positivity to full N proteins of HCoV-229E and -OC43 than truncated versions of N.</li> <li>• No cross-reactivity with SARS-CoV nor HCoV-229E was observed. Immunoblotting assessment on three structural regions of the NP showed strongest reactivity at the central-linker region (aa174-300) followed by the C-terminal domain (aa301-448), and low at the N-terminal domain (aa1-173). Western blot assay against the recombinant protein in sera from adults (92.3% positive), patients with respiratory infection symptoms (82.3%), and cord blood samples (93.3%), showed no reaction to SARS-CoV-1 NP but 81% reacted to HCoV-229E NP.</li> <li>• The reaction (quantified in 38 of the 52 HCoV-OC43 positive sera) to the three structural regions showed three distinct patterns. All patterns reacted highly to the central-linker region, another pattern was</li> </ul> |
| <a href="#">(Mu et al. 2008)</a>    | 2003-2008 | China             | Serological challenge study | SARS patients (n=457/460+, 35-114 days post-symptom onset)<br>healthy donors (n=650/650-)                                                                                                    | Immunoblot analysis, IFA, ELISA, neutralization test,                     |                                                                                                                                                                                                                                                                                                                                                                                                                                                                                                                                                                                                                                                                                                                                                                                                                                                                                                                                                                                                                                                                                                                                                                                                                                                                                                                                                                                                                                                                                                                                                                                                                                                                                                                                                                                                    |
| <a href="#">(Liang et al. 2013)</a> | 2013      | Taiwan            | Serological study           | n=26 human serum samples from young healthy adults 18-26 yo,<br>n=17 serum samples people 50-80 yo who reported to the hospital with respiratory tract infection,<br>n=15 cord blood samples | HCoV-OC43, other human coronaviruses (HCoV-229E, SARS-CoV-1) Western blot |                                                                                                                                                                                                                                                                                                                                                                                                                                                                                                                                                                                                                                                                                                                                                                                                                                                                                                                                                                                                                                                                                                                                                                                                                                                                                                                                                                                                                                                                                                                                                                                                                                                                                                                                                                                                    |

|                                          |           |                         |                                                                        |                                                                                                                                                                                                                                              |                                                                                                      |                                                                                                                                                                                                                                                                                                                                                                  |
|------------------------------------------|-----------|-------------------------|------------------------------------------------------------------------|----------------------------------------------------------------------------------------------------------------------------------------------------------------------------------------------------------------------------------------------|------------------------------------------------------------------------------------------------------|------------------------------------------------------------------------------------------------------------------------------------------------------------------------------------------------------------------------------------------------------------------------------------------------------------------------------------------------------------------|
| <a href="#">(Carattoli et al. 2005)</a>  | 2005      | Italy and Germany       | Serological assay development (protein-based) for SARS-CoV-1 diagnosis | n=6 SARS-CoV-1 Controls= (n=20 healthy donors) and (n=73 patients with non-SARS-CoV-1 infections)                                                                                                                                            | SARS-CoV-1, ELISA, immunocytochemical assay                                                          | <p>also reactive to the C-terminal region, and the last pattern strongly reacted to all.</p> <ul style="list-style-type: none"> <li>Membrane protein could be used to distinguish serum from SARS-CoV-1 patients who had strong responses and low inter-subject variability in responses to the M2 antigen. Healthy controls did not show a response.</li> </ul> |
| <a href="#">(He et al. 2005)</a>         | 2003-2005 | United States and China | Serological study recognizing epitope                                  | n=40 convalescent SARS-CoV-1 patients 30-60 days after onset, n=30 healthy blood donors<br>Passive immunization was conducted on 10-12 week old BALBc mice<br>Human monoclonal antibody generation were described in: Traggiai et al. (2004) | SARS-CoV-1, ELISA                                                                                    | <ul style="list-style-type: none"> <li>Showed the membrane protein can induce antibodies in experimental animal inoculation.</li> </ul>                                                                                                                                                                                                                          |
| <a href="#">(Rockx et al. 2008)</a>      | 2008      | United States           | Mouse challenge study                                                  |                                                                                                                                                                                                                                              | SARS-CoV-1, Neutralization, ELISA,                                                                   | <ul style="list-style-type: none"> <li>Found escapes from mAbs targeting the spike receptor-binding domain (RBD) of SARS-CoV.</li> </ul>                                                                                                                                                                                                                         |
| <a href="#">Zhu et al. 2007</a>          | 2007      | China                   | Immunogenicity study                                                   | n=6 bats showing positive or negative cross-reactivity with SARS-Cov-1                                                                                                                                                                       | SARS-CoV-1, HIV-pseudotyped S proteins (SARS-CoV-1), ELISA, neutralization                           | <ul style="list-style-type: none"> <li>While investigating broadly neutralizing antibodies, escapes from mAbs targeting the spike receptor-binding domain (RBD) of SARS-CoV were observed from zoonotic (palm civets and bats) to early to late human strains.</li> </ul>                                                                                        |
| <a href="#">(Liu et al. 2007)</a>        | 2002-2007 | China                   | Phylogenetic and cross-neutralization study                            | Convalescent sera 3-12 months post-recovery (n=20) in SARS-CoV-1 pseudovirus study<br>Full-length civet S gene<br>Immunization of 6-8 week BALBc mice<br>Other convalescent sera collected 2002-2003 at 3-12, 24 month post-recovery         | SARS-CoV-1, pseudovirus for contranfecting viral entry assay, neutralization assay and civet viruses | <ul style="list-style-type: none"> <li>Sera from BALB/c mice immunized with full length S protein in civet strains were ineffective against human SARS-CoV and vice versa.</li> </ul>                                                                                                                                                                            |
| <a href="#">(He et al. 2006)</a>         | 2002-2006 | United States           | RBD study                                                              | SARS-CoV-1 isolates from both 2002-2003 and 2003-2004 outbreaks and palm civet isolate SZ3<br>Immunized mice and rabbits                                                                                                                     | SARS-CoV-1, ELISA, neutralization                                                                    | <ul style="list-style-type: none"> <li>Single mutations were shown to disrupt neutralizability even though there was significant cross-reactions between mAbs against conformational epitopes of RBD with multiple mutational differences.</li> </ul>                                                                                                            |
| <a href="#">(Elshabrawy et al. 2012)</a> | 2012      | United States           | Immunotherapy study                                                    | Produced and characterized human monoclonal antibodies that neutralized SARS-CoV-1 by binding the S2 protein                                                                                                                                 | SARS-CoV-1, and pseudovirus generated with methods from (Coughlin et al. 2007) ELISA                 | <ul style="list-style-type: none"> <li>Monoclonal antibodies targeting regions critical for fusion and entry on the S2 protein appeared broadly neutralizing against SARS-CoV strains.</li> </ul>                                                                                                                                                                |

|                                    |                                    |       |                      |                                                                                                                          |                                                                                  |                                                                                                                                                                                                                                                                                                                                                                                                                                                                                                                                                                                                                                                                                                                                                                                                                                                                                                                                                                                                                                                                                                                                                                                                                                                                                                                                                                                                                                                                                                                                                                                                                                                                                                                                                                                                            |
|------------------------------------|------------------------------------|-------|----------------------|--------------------------------------------------------------------------------------------------------------------------|----------------------------------------------------------------------------------|------------------------------------------------------------------------------------------------------------------------------------------------------------------------------------------------------------------------------------------------------------------------------------------------------------------------------------------------------------------------------------------------------------------------------------------------------------------------------------------------------------------------------------------------------------------------------------------------------------------------------------------------------------------------------------------------------------------------------------------------------------------------------------------------------------------------------------------------------------------------------------------------------------------------------------------------------------------------------------------------------------------------------------------------------------------------------------------------------------------------------------------------------------------------------------------------------------------------------------------------------------------------------------------------------------------------------------------------------------------------------------------------------------------------------------------------------------------------------------------------------------------------------------------------------------------------------------------------------------------------------------------------------------------------------------------------------------------------------------------------------------------------------------------------------------|
| <a href="#">(Tian et al. 2020)</a> | 2019-2020                          | China | RBD study            | Antibody CR3022 isolated from convalescent SARS-CoV-1 patient                                                            | SARS-CoV-2, SARS-CoV-1, MERS-CoV<br>Biolayerinterferomtry binding assay, ELISA   | <ul style="list-style-type: none"> <li>Differential binding of monoclonal antibodies from SARS patients to the receptor binding domain (RBD) of SARS-CoV-1 and SARS-CoV-2.</li> </ul> <p>Differences between SARS-CoV and SARS-CoV-2 are largely located at C-terminus residues of the RBD, with structural differences that affect sensitivity to neutralizing antibodies but does not diminish the ability to bind to the ACE2 receptor (suggested by sequence analysis). One antibody potently bound to SARS-COV-2 RBD protein but did not compete with the RBD for binding to the ACE2 receptor or with other RBD-directed antibodies for binding to the RBD</p> <ul style="list-style-type: none"> <li>Five recombinant receptor binding domains (rRBD) proteins were constructed with mutations detected from MERS-CoV strains detected in humans (2012-2015) and camels.</li> <li>These rRBDs maintain functionality and do induce potent neutralizing antibodies. When residues in their receptor binding motifs were mutated to evade neutralization, cross-reactivity persisted but binding affinity to DPP-4 was lost suggesting limited antigenic escape for MERS-CoV. 2/29 amino acid differences between MERS Eng1 isolated from a patient transferred to London and MERS SA1 from Saudi Arabia were on the S glycoprotein.</li> <li>Evaluated whether antibodies (binding and neutralizing) and T cell responses induced by childhood vaccination (AMPV, BCG, DPT, HBV, HIB, JEV, MMRV [and MV, RV], OPV, PI, SV, VV [varicella vaccine]) cross-reacted with SARS-CoV-1. They found no cross reactivity in any assay. They did find serum from children with prior SARS-CoV-1 infections cross-reacted to vaccine antigens, likely because the children received these vaccines.</li> </ul> |
| <a href="#">(Tai et al. 2017)</a>  | 2012-2017                          | China | RBD Study            | n=20 human and camel isolates from GenBank database                                                                      | MERS-CoV and MERS-pseudovirus, Western blot, coimmunoprecipitation assay, ELISA, |                                                                                                                                                                                                                                                                                                                                                                                                                                                                                                                                                                                                                                                                                                                                                                                                                                                                                                                                                                                                                                                                                                                                                                                                                                                                                                                                                                                                                                                                                                                                                                                                                                                                                                                                                                                                            |
| <a href="#">(Yu et al. 2007)</a>   | 2007<br>Vaccine produced 2002-2003 | China | Pooled vaccine study | Pooled positive sera from people with SARS-CoV-1<br>Antisera from group of inbred mice immunized with childhood vaccines | SARS-CoV-1, ELISA                                                                |                                                                                                                                                                                                                                                                                                                                                                                                                                                                                                                                                                                                                                                                                                                                                                                                                                                                                                                                                                                                                                                                                                                                                                                                                                                                                                                                                                                                                                                                                                                                                                                                                                                                                                                                                                                                            |

|                                          |           |               |                                        |                                                                                                                                                                                                                                                                                                                     |                                                                              |                                                                                                                                                                                                                                                                                                                                                                                                                                                                                                                                                                                     |
|------------------------------------------|-----------|---------------|----------------------------------------|---------------------------------------------------------------------------------------------------------------------------------------------------------------------------------------------------------------------------------------------------------------------------------------------------------------------|------------------------------------------------------------------------------|-------------------------------------------------------------------------------------------------------------------------------------------------------------------------------------------------------------------------------------------------------------------------------------------------------------------------------------------------------------------------------------------------------------------------------------------------------------------------------------------------------------------------------------------------------------------------------------|
| <a href="#">(Resta et al. 1985)</a>      | 1982-1985 | United States | Isolation study                        | Stool samples from infants with necrotizing colitis (n=12) and Control samples (n=14)                                                                                                                                                                                                                               | Human enteric coronavirus, HCoV-OC43 and -229E, mouse hepatitis virus, ELISA | <ul style="list-style-type: none"> <li>Infants with necrotizing enterocolitis were found to have coronavirus particles by electron microscopy. Serum from infants did not cross react with common human CoVs (OC43, 229E), mouse hepatitis virus (MHV) or strains identified as Breda 1 and 2.</li> <li>Identified greater prevalence human enteric coronaviruses in infants with acute gastroenteritis compared to age-matched controls and that virus and antiserum showed antigenic cross-reactivity (immune electron microscopy) to HECV-24, HECV-35, and HCoV-OC43.</li> </ul> |
| <a href="#">(Gerna et al. 1984)</a>      | 1984      | Italy         | Antigenic relatedness study            | acute gastroenteritis (n=34/208) age-matched controls (n=3/182)                                                                                                                                                                                                                                                     | Human enteric coronavirus and HCoV-OC43                                      |                                                                                                                                                                                                                                                                                                                                                                                                                                                                                                                                                                                     |
| <a href="#">(Han et al. 2006)</a>        | 2006      | United states | Challenge study                        | Child with acute diarrhea, gnotobiotic calves (n=4)                                                                                                                                                                                                                                                                 | Human enteric coronavirus and bovine enteric coronavirus, ELISA              | <ul style="list-style-type: none"> <li>Identified an HCoV from a child with acute diarrhea as a variant of a bovine CoV.</li> </ul>                                                                                                                                                                                                                                                                                                                                                                                                                                                 |
| <a href="#">(Gerdes et al. 1981)</a>     | 1980-1981 | United States | Serological cross-neutralization study | n=2 multiple sclerosis patients                                                                                                                                                                                                                                                                                     | HCoV-229E and -OC43, plaque assay and plaque neutralization                  | <ul style="list-style-type: none"> <li>Two HCoV strains extracted from brain tissue of multiple sclerosis patients were cross-neutralized by antiserum against HCoV-OC43 but not -229E.</li> <li>Sera positive for HCoV-OC43 were also positive for hemagglutinating encephalomyelitis virus (HEV) while HCoV-229E and HCoV-B814 positive sera were not.</li> </ul>                                                                                                                                                                                                                 |
| <a href="#">(Kaye et al. 1977)</a>       | 1960-1977 | United States | Serological assay study                | n=345 sera from adults with and without respiratory illness, n=213 sera were from adult men in a chronic bronchitis study, n=88 acute and convalescent sera with URI, n=44 sera from influenza vaccine study<br>n=104 acute and convalescent serum pairs from children in longitudinal study of respiratory illness | HCoV-229E and -OC43, indirect hemagglutination, and CF                       | <ul style="list-style-type: none"> <li>Individuals with and without possible contact with swine had significant differences in their HCoV-OC43 and HEV responses while sera collected from swine with Abs to HEV were not positive for HCoV-OC43.</li> <li>Suggest cross-reaction between the two viruses but did not preclude the possibility of uncharacterized CoV.</li> <li>Three different antigens for coronaviruses.</li> </ul>                                                                                                                                              |
| <a href="#">(Schmidt and Kenny 1981)</a> | 1981      | United States | Immunogenicity and Antigenicity study  | Paired sera (acute collected close to onset and convalescent 25-58 days later) from pneumonia patients                                                                                                                                                                                                              | HCoV-229E and -OC43, CF, HI, neutralization                                  | <ul style="list-style-type: none"> <li>Samples from pneumonia patients had high reactivity to the 'slow' migrating antigen (Two-dimensional immunoelectrophoresis) of HCoV-OC43 than -229E (probably spike) suggesting it was highly immunogenic.</li> </ul>                                                                                                                                                                                                                                                                                                                        |

|                                          |           |               |                                      |                                                                                                                                                                                                                                                                                                                                                                   |                                                              |                                                                                                                                                                                                                                                                                                                                                                                                                         |
|------------------------------------------|-----------|---------------|--------------------------------------|-------------------------------------------------------------------------------------------------------------------------------------------------------------------------------------------------------------------------------------------------------------------------------------------------------------------------------------------------------------------|--------------------------------------------------------------|-------------------------------------------------------------------------------------------------------------------------------------------------------------------------------------------------------------------------------------------------------------------------------------------------------------------------------------------------------------------------------------------------------------------------|
| <a href="#">(McIntosh et al. 1970)</a>   | 1965-1970 | United States | Seroepidemiological study            | Acute sera and nasopharyngeal washing from NIH employees with respiratory tract disease on or before fourth day of illness and coronavirus convalescent sera three weeks later (n=466)<br>Throat and nasal swabs from pediatric patients on admission and three weeks later (n=565)<br>Human embryonic tracheal organ cultures were used for diploid cell culture | HCoV-229E, -OC43, -OC38, and MHV, CF                         | <ul style="list-style-type: none"> <li>The highest percentage of dual responses (n=91) involved children with -OC38 and -OC43 in coronavirus antigen tests. Some overlap between MHV and -OC38 and/or -OC43. No or few dual response with -229E and MHV or -229E and -OC38 and/or -OC43</li> </ul>                                                                                                                      |
| <a href="#">(Monto and Lim 1974)</a>     | 1966-1974 | United States | Prospective study                    | Families where parents were under 46 yo                                                                                                                                                                                                                                                                                                                           | HCoV-OC43CF and HAI                                          | <ul style="list-style-type: none"> <li>Showed low agreement between CF and HI for HCoV-OC43 in sync with a large outbreak of HCoV-229E. Agreement was higher in 1966 and late-1968 to 1969 and showed increased agreement with neutralization test results in selected subsets (66.7%) compared to 28.6% in the other time periods.</li> </ul>                                                                          |
| <a href="#">(Tuan et al. 2007)</a>       | 2003-2007 | Vietnam       | Retrospective cohort study           | n=63 SARS-CoV-1 cases (n=53 primary cases, n=37 healthcare workers)<br>n=252 close contact of primary 45 cases                                                                                                                                                                                                                                                    | SARS-CoV-1, ELISA and RT PCR                                 | <ul style="list-style-type: none"> <li>Cross-reactivity between HCoV-OC43 and SARS-CoV-1 was found in one individual while cross-reactivity between HCoV-229E and -OC43 were not found.</li> </ul>                                                                                                                                                                                                                      |
| <a href="#">(Richardson et al. 2004)</a> | 2004      | Canada        | Diagnostic review                    | varies                                                                                                                                                                                                                                                                                                                                                            | SARS-CoV-1, review of assays and diagnostics                 | <ul style="list-style-type: none"> <li>Immunological cross-reactivity has not been detected in SARS-CoV-1 and coronaviruses in antigenic groups 1 and 2. However, after antibody testing for an outbreak of HCoV-OC43, some positive results for SARS-CoV-1 suggest there may be cross-reactivity. This may impact assay development.</li> </ul>                                                                        |
| <a href="#">(Severance et al. 2008)</a>  | 2008      | United States | Seroprevalence and immunoassay study | n=196 between 18-65 yo served as control<br>Seropositivity assay cutoffs were determined from n=10 seronegative children from a vaccine study                                                                                                                                                                                                                     | HCoV-229E, -HKU1, -NL63, -OC43, and feline coronavirus ELISA | <ul style="list-style-type: none"> <li>Correlations between antibody levels with the highest association were within the same group.</li> <li>Cross-reactivity in this study may be due to using the whole nucleocapsid sequence. However, because there was an absence of reactivity to the feline coronavirus this cannot be fully explained by groups and may be due to exposure to the particular virus.</li> </ul> |

|                                         |           |        |                          |                                                     |                  |                                                                                                                                                                                   |
|-----------------------------------------|-----------|--------|--------------------------|-----------------------------------------------------|------------------|-----------------------------------------------------------------------------------------------------------------------------------------------------------------------------------|
| <a href="#">(Kossvakis et al. 2015)</a> | 2014-2015 | Greece | Laboratory investigation | An imported case of MERS-CoV to Greece (69 yo male) | MERS-CoV, RT PCR | <ul style="list-style-type: none"> <li>Implications for receptor binding efficiency were found in unique amino acid substitution in the spike receptor binding domain.</li> </ul> |
|-----------------------------------------|-----------|--------|--------------------------|-----------------------------------------------------|------------------|-----------------------------------------------------------------------------------------------------------------------------------------------------------------------------------|

**Supplementary Table 6. Summary of Immunopathogenesis**

| Study                                | Year of study | Country/Region | Study type                          | Participants                                                                                 | Viruses/assay                | Key findings                                                                                                                                                                                                                                                                                                                                                                                                                                                                                                                                                                  |
|--------------------------------------|---------------|----------------|-------------------------------------|----------------------------------------------------------------------------------------------|------------------------------|-------------------------------------------------------------------------------------------------------------------------------------------------------------------------------------------------------------------------------------------------------------------------------------------------------------------------------------------------------------------------------------------------------------------------------------------------------------------------------------------------------------------------------------------------------------------------------|
| <a href="#">(Peiris et al. 2003)</a> | 2003          | Hong Kong      | Prospective study                   | Residents of a housing estate. Patients meeting WHO SARS definition (n=75)                   | SARS-CoV-1, RT PCR           | <ul style="list-style-type: none"> <li>The timing of IgG (starts approximately day 10) is linked to decreasing viral load but severe clinical worsening.</li> <li>Report enhancement of Abs within episode.</li> <li>This points to the host's response and not viral replication and ADE.</li> </ul>                                                                                                                                                                                                                                                                         |
| <a href="#">Ho et al. 2005)</a>      | 2003          | Taiwan         | Retrospective study of patient data | All patients with probable SARS-CoV-1 (n=665) with (n=347) positive cases                    | SARS-CoV-1, RT PCR and ELISA | <ul style="list-style-type: none"> <li>Longer hospital stays and death were associated with early seroconversions of neutralizing Abs to SARS-CoV-1 spike protein, week 5 vs week 8 post fever onset.</li> <li>Worsening pulmonary function was associated with decreasing viral load. This plus clinical studies on cytokines, suggests activation of the Th1 cell-mediated immunity and a hyper-innate inflammatory response lead to severe infection.</li> <li>Suggests ADE and priming effect from existing antibodies against endemic strains of coronavirus.</li> </ul> |
| <a href="#">(Hsueh et al. 2003)</a>  | 2003          | Taiwan         | Serological study                   | Hospitalized patients (n=7, n=6 male) who met the CDC and WHO case definition for SARS-CoV-1 | SARS-CoV-1, IFA, RT PCR      | <ul style="list-style-type: none"> <li>There was an upsurge of IgG antibodies, which correlated with ARDS progression. This may be due to host response rather than viral load and suggests ADE.</li> </ul>                                                                                                                                                                                                                                                                                                                                                                   |

**Supplementary Table 6. Summary of Immunopathogenesis**

| Study                                 | Year of study | Country/Region | Study type                | Participants                                                                                                                                                                          | Viruses/assay                                     | Key findings                                                                                                                                                                                                                                                                                                                                                                                                                                                                                                                                                                   |
|---------------------------------------|---------------|----------------|---------------------------|---------------------------------------------------------------------------------------------------------------------------------------------------------------------------------------|---------------------------------------------------|--------------------------------------------------------------------------------------------------------------------------------------------------------------------------------------------------------------------------------------------------------------------------------------------------------------------------------------------------------------------------------------------------------------------------------------------------------------------------------------------------------------------------------------------------------------------------------|
| <a href="#">(Cameron et al. 2008)</a> | 2008          | Varies         | Review                    | Varies. One study cited included well-defined SARS-CoV-1 patients from Toronto (n=50)                                                                                                 | SARS-CoV-1                                        | <ul style="list-style-type: none"> <li>• Expression of a group of proinflammatory cytokines and chemokines is associated with acute and possibly progressing SARS. IFN and ISG are critical in SARS clinical evolution. Non-severe, severe, and fatal patients expressed differences IFN and ISG compared to healthy controls. The study supported prolonged levels of proinflammatory chemokines due to absence of effective adaptive response for virus clearance but the mechanism which led to the malfunctional switch between innate and adaptive is unknown.</li> </ul> |
| <a href="#">(Talbot et al. 2009)</a>  | 1977-2001     | United States  | Longitudinal cohort study | children <5 years old LRI (1977-2001) (n=1830, 3958 child-year) (n=948 LRI), (n=553 nasal wash specimens) URI (1982-2001)(n=1481 children and n=6724 episodes) (n=2082 URI specimens) | HCoV-229E, -NL36, and -OC43, RT PCR               | <ul style="list-style-type: none"> <li>• RSV-associated LRI occurs in children &lt;6 months while LRI with HCoV was in children 6-23 months. This may be due to the presence of maternal antibodies in the LRT or immunopathogenesis. URI infection burden was close to uniform with regard to age.</li> </ul>                                                                                                                                                                                                                                                                 |
| <a href="#">(Jaume et al. 2011)</a>   | 2011          | Hong Kong      | <i>In vitro study</i>     | Various cell lines and 6-8 week old BALB/c mice (n= 4 to 5 per group)                                                                                                                 | SARS-CoV-1, IF, ELISA, neutralization, and RT PCR | <ul style="list-style-type: none"> <li>• Anti-Spike immune serum inhibited viral entry in permissive cell lines but potentiated infection of immune cells by SARS-CoV-1 particles. Antibody-mediated infection was dependent on Fc-gamma-RII but did not use the pathway used by ACE2. None of the non-neutralizing responses elicited towards different immunogens involved IgG2a. ADE for SARS-CoV-1 uses a novel entry method into immune cells.</li> </ul>                                                                                                                 |
| <a href="#">(Yip et al. 2014)</a>     | 2014          | Hong Kong      | <i>In vitro study</i>     | Healthy samples were collected from Hong Kong Red Cross Blood Transfusion Service and BALBc mice were immunized                                                                       | SARS-CoV-1, IF, ELISA and RT PCR                  | <ul style="list-style-type: none"> <li>• Human macrophages can be infected by SARS-CoV as a result of IgG-mediated ADE. This indicates that this infection route requires signaling pathways activated downstream of binding to FcγRII receptors. In monocytes, macrophages, and monocyte-derived dendritic cells, virus replicates up to six hours but does not exit the cell.</li> </ul>                                                                                                                                                                                     |

**Supplementary Table 6. Summary of Immunopathogenesis**

| Study                                       | Year of study | Country/Region | Study type            | Participants                                                                                                | Viruses/assay              | Key findings                                                                                                                                                                                                                                                                                                                                                                                                                                                                                                                                         |
|---------------------------------------------|---------------|----------------|-----------------------|-------------------------------------------------------------------------------------------------------------|----------------------------|------------------------------------------------------------------------------------------------------------------------------------------------------------------------------------------------------------------------------------------------------------------------------------------------------------------------------------------------------------------------------------------------------------------------------------------------------------------------------------------------------------------------------------------------------|
| <a href="#">(Fu et al. 2020)</a>            | 2020          | Varies         | Review                | Varies                                                                                                      | SARS-Cov-1 and 2 and HNL36 | <ul style="list-style-type: none"> <li>In a SARS-CoV-1 macaque model it was found that S-IgG present in lungs can cause severe lung injury. In vaccinated macaques acute lung injury was more pronounced than those unvaccinated. This suggests that ADE may be why patients who produce neutralizing antibodies early experience persistent inflammation, ARD, and succumb to SARS-CoV-1.</li> </ul>                                                                                                                                                |
| <a href="#">(Wang et al. 2014)</a>          | 2014          | Taiwan         | <i>In vitro study</i> | Anti-SARS-CoV-1 sera was collected from SARS-Cov-1 infected patients in Taiwan<br>BALBc mice were immunized | SARS-CoV-1, IF and RT PCR  | <ul style="list-style-type: none"> <li>Upon infection, TNF-alpha, IL-4 and IL-6 expressions increased while only trace amounts of IL-3 and IL-1beta appeared. Mild to moderate enhancement by various anti-S1a and anti-S1b murine mAbs generated except one particular anti-S1b clone that neutralized it. No effect was seen for anti-N mAbs. ADE is mediated by diluted antibodies against envelope spike proteins not nucleocapsid proteins. HL-CZ cells express ACE2 receptors and display a cytopathic effect caused by SARS-CoV-1.</li> </ul> |
| <a href="#">(Yip et al. 2016)</a>           | 2009-2011     | Hong Kong      | <i>In vitro study</i> | 6-8 week BALBc mice were immunized (n=4-5 per group)                                                        | SARS-CoV-1, IF and RT PCR  | <ul style="list-style-type: none"> <li>Antibody-dependent enhancement (ADE) allows SARS-CoV-1 to infect primary human macrophages, but it does not sustain productive viral replication in the infected cells. ADE of SARS-CoV-1 infection does not change pro-inflammatory gene expression profile of primary human macrophages. TNF-alpha, IL-4 and IL-6 expressions heightened while IL-3 and IL-1beta only appeared in trace amounts. This could be due to the cell line differences or the set of mediators assessed.</li> </ul>                |
| <a href="#">(Perlman and Dandekar 2005)</a> | 2005          | Varies         | Review                | Varies                                                                                                      | SARS-CoV-1                 | <ul style="list-style-type: none"> <li>Prolonged tissue destruction can heighten presentation of host proteins to T- or B-cells and result in adaptive response against self, i.e. epitope spreading.</li> </ul>                                                                                                                                                                                                                                                                                                                                     |

**Supplementary Table 6. Summary of Immunopathogenesis**

| Study                                 | Year of study | Country/Region | Study type            | Participants                                                                                                                                                       | Viruses/assay                                                                                      | Key findings                                                                                                                                                                                                                                                                                                                                                                                                                                                                                                                                               |
|---------------------------------------|---------------|----------------|-----------------------|--------------------------------------------------------------------------------------------------------------------------------------------------------------------|----------------------------------------------------------------------------------------------------|------------------------------------------------------------------------------------------------------------------------------------------------------------------------------------------------------------------------------------------------------------------------------------------------------------------------------------------------------------------------------------------------------------------------------------------------------------------------------------------------------------------------------------------------------------|
| <a href="#">(Lin et al. 2005;)</a>    | 2003          | Taiwan         | Serological study     | Sera was collected from SARS-CoV-1 positive patients (n=80 < 20 days after fever onset) and n=41 >=20 day after fever) n=10 controls                               | SARS-CoV-1, Preabsorption and binding assays, ELISA                                                | <ul style="list-style-type: none"> <li>Autoantibodies reacted with A549 cells</li> <li>Evidence of pathogenesis when anti-S2 Abs in SARS-CoV-1 cause cytotoxic injury as well as enhanced immune cell adhesion to epithelial cells.</li> </ul>                                                                                                                                                                                                                                                                                                             |
| <a href="#">Fang et al. 2010</a>      | 2003          | Taiwan         | Proteomic study       | Sera was collected from SARS-CoV-1 positive patients (n=5 late stage >=20 days after fever onset)                                                                  | SARS-CoV-1, ELISA, IF, WB                                                                          | <ul style="list-style-type: none"> <li>Evidence of SARS-CoV-1 pathogenesis was found in upregulated expression of annexin A2 by SARS-associated cytokines and the cross-reactivity of anti-SARS-CoV-1 S2 antibodies to annexin A2.</li> </ul>                                                                                                                                                                                                                                                                                                              |
| <a href="#">(Cheng et al. 2005)</a>   | 2005          | Hong Kong      | <i>In vitro study</i> | The SARS-CoV genomic library was used and mice were infected                                                                                                       | SARS-CoV-1, Phage ELISA                                                                            | <ul style="list-style-type: none"> <li>Evidence of anti-N antibodies that cross react with IL-11 including lung and bone marrow.</li> <li>High anti-N antibodies induced relatively early during infection may be involved in the thrombocytopenia and lymphopenia observed early in SARS-CoV-1 infection.</li> </ul>                                                                                                                                                                                                                                      |
| <a href="#">(Yasmon et al. 2012)</a>  | 2012          | Germany        | Serological study     | n=20 health sera were used as control n=129 (n=61 HIV-1 negative and n=68 HIV-1 positive) were collected from IDU in Jakarat, Indonesia <21 yo                     | SARS-CoV-1 and HIV, IgG ELISA                                                                      | <ul style="list-style-type: none"> <li>Show anti-N antibodies that cross react with IL-11.</li> </ul>                                                                                                                                                                                                                                                                                                                                                                                                                                                      |
| <a href="#">(Ksiazek et al. 2003)</a> | 2003          | United States  | Serological Study     | Clinical specimens=serum from SARS-CoV-1 patients in Singapore, Bangkok, and Hong Kong (n=19). Healthy blood from the US CDC And patients with known OC43 and 229E | Group 1 coronaviruses, SARS-CoV-1 RT PCR, IFA, ELISA, suckling ICR mice were used to isolate virus | <ul style="list-style-type: none"> <li>Did not show cross-reactivity with the same immune human serum sample and feline infectious peritonitis virus 1 antigen.</li> <li>Paired human serum samples with diagnostic increases (by a factor &gt;=4) in antibody (with very high titers to the homologous viral antigen in the convalescent-phase serum) to the two known human coronaviruses, HCoV-OC43 (13 pairs) and -229E (14 pairs), showed no re-activity in either acute- or convalescent-phase serum with the newly isolated coronavirus.</li> </ul> |

**Supplementary Table 6. Summary of Immunopathogenesis**

| Study                                    | Year of study | Country/Region                | Study type          | Participants                                                                                                                  | Viruses/assay                                                   | Key findings                                                                                                                                                                                                                                                                                                                                                                                                                                                                                                                                                                                                                                                                                                                                                                                        |
|------------------------------------------|---------------|-------------------------------|---------------------|-------------------------------------------------------------------------------------------------------------------------------|-----------------------------------------------------------------|-----------------------------------------------------------------------------------------------------------------------------------------------------------------------------------------------------------------------------------------------------------------------------------------------------------------------------------------------------------------------------------------------------------------------------------------------------------------------------------------------------------------------------------------------------------------------------------------------------------------------------------------------------------------------------------------------------------------------------------------------------------------------------------------------------|
| <a href="#">(Gorse et al. 2020)</a>      | 2009-2013     |                               | Serological study   | Group 1: 99 of age ≥ 60 with underlying chronic lung and heart disease;<br>Group 2: 101 healthy adults of age 21-40 years old | HCoV-229E, -NL63, -OC43                                         | <ul style="list-style-type: none"> <li>Baseline binding antibody titers to all strains (by ELISA) were higher in the older adults.</li> <li>Post infection, neutralizing Abs were more efficiently triggered in the older group to HCoV suggesting the role of cross-reacting Abs from past exposures.</li> <li>Antibody-dependent enhancement of SARS-CoV and feline infectious peritonitis virus infectivity has been reported and can be mediated by antibodies to S protein epitopes.</li> <li>studies of the S protein sequence and neutralization antigenicity suggest that serum antibodies may not cross-react as well with the laboratory strains of HCoV that were used in our neutralization assays, affecting the sensitivity of the neutralization assay used in the study.</li> </ul> |
| <a href="#">(Bermingham et al. 2004)</a> | 2004          | United Kingdom                | Review              | Various                                                                                                                       | Review of molecular detection, targets, diagnostics, and assays | <ul style="list-style-type: none"> <li>Demonstrates limited cross reactivity with antibodies to human group 1 or group 2 coronaviruses and group 1 animal coronaviruses</li> </ul>                                                                                                                                                                                                                                                                                                                                                                                                                                                                                                                                                                                                                  |
| <a href="#">(Yang et al. 2005)</a>       | 2004          | United States and Switzerland | Neutralization test | Purified immune IgG came from vaccine candidates<br>5 female BALBc mice per group (6-8 weeks old)                             | SARS-CoV-1 and hACE-2, human and civet S proteins               | <ul style="list-style-type: none"> <li>Abs that neutralized most human S glycoproteins enhanced entry mediated by the civet virus S glycoproteins. The mechanism of enhancement involved the interaction of Abs with conformational epitopes in the hACE-2-binding domain</li> <li>Entry of SARS-CoV-1 can be enhanced by Abs.</li> </ul>                                                                                                                                                                                                                                                                                                                                                                                                                                                           |
| <a href="#">(De Groot 2003)</a>          | 2003          | United States                 | Review              | Varies                                                                                                                        | SARS-CoV-1 and HIV                                              | <ul style="list-style-type: none"> <li>Antibody seroconversion occurs around day 10. Observed antibody-mediated exacerbation in feline and bovine coronaviruses.</li> <li>SARS-CoV-1, like HIV, is an RNA virus that has an error-prone replication mechanism, which may explain mutations in the SARS-CoV genome in the S protein along with response to immune pressure.</li> </ul>                                                                                                                                                                                                                                                                                                                                                                                                               |
| <a href="#">(Subbarao et al. 2004)</a>   | 2003          | United States                 | Mouse model study   | Female BALBc mice 4-6 weeks old                                                                                               | SARS-CoV-1, neutralization assay                                | <ul style="list-style-type: none"> <li>Challenge with SARS-CoV-1 revealed primary infection provided high levels of resistance to replication of the challenge virus or immune serum.</li> <li>Neutralizing Abs were developed 28 days later.</li> <li>Rapid time course for SARS-CoV-1 replication in mice.</li> </ul>                                                                                                                                                                                                                                                                                                                                                                                                                                                                             |

**Supplementary Table 6. Summary of Immunopathogenesis**

| Study                                  | Year of study | Country/Region | Study type            | Participants                                                                                                                                      | Viruses/assay                                   | Key findings                                                                                                                                                                                                                                                                                                                                 |
|----------------------------------------|---------------|----------------|-----------------------|---------------------------------------------------------------------------------------------------------------------------------------------------|-------------------------------------------------|----------------------------------------------------------------------------------------------------------------------------------------------------------------------------------------------------------------------------------------------------------------------------------------------------------------------------------------------|
| <a href="#">(Weiss and Scott 1981)</a> | 1980          | United States  | Serum challenge Study | 12 week old specific-pathogen-free kittens                                                                                                        | Feline infectious peritonitis virus (FIPV), IF, | <ul style="list-style-type: none"> <li>Non-immune kittens passively immunized with high titer serum developed enhanced disease. Kittens with FIPV antibodies developed clinical signs earlier and died more rapidly compared to kittens non-sensitized that did not show clinical signs or die of FIPV revealing evidence of ADE.</li> </ul> |
| <a href="#">(Yang et al. 2004)</a>     | 2004          | United States  | Vaccine Study         | Female BALBc mice 6-8 weeks old<br>Protein expression was confirmed with recovered patients                                                       | SARS-CoV-1, ELISA                               | <ul style="list-style-type: none"> <li>DNA vaccine encoding the S protein of SARS-CoV-1 induces T cell and neutralizing antibodies as well as protective immunity. Mice vaccinated with an expression vector encoding S elicited neutralizing antibodies.</li> </ul>                                                                         |
| <a href="#">(Rockx et al. 2008)</a>    | 2008          | United States  | Mouse challenge study | Passive immunization was conducted on 10-12 week old BALBc mice<br>Human monoclonal antibody generation were described in: Traggiai et al. (2004) | SARS-CoV-1, neutralization, ELISA,              | <ul style="list-style-type: none"> <li>The majority of human mAbs recognize a set of overlapping epitopes, since reactivity was lost by denaturation of the antigen (as seen in a cited hepatitis B study).<br/>Escape mutant analysis to identify key residues in neutralizing activity of two cross-neutralizing mAb.</li> </ul>           |
| <a href="#">(Dawson et al. 2019)</a>   | 2019          | United States  | Review                | n=407 articles reviewed and n=208 included                                                                                                        | MERS-CoV, various diagnostic assays             | <ul style="list-style-type: none"> <li>The main route of entry for MERS is di-peptidyl peptidase 4 (CD26) and like SARS-CoV-1 uses a spike protein as the RBD.</li> </ul>                                                                                                                                                                    |

**Supplementary Table 7. Summary of studies on population-level seroprevalence of CoV**

| Author and Year       | Virus                        | Assay                          | Figures Digitized | Notes                                                                                                                                                         |
|-----------------------|------------------------------|--------------------------------|-------------------|---------------------------------------------------------------------------------------------------------------------------------------------------------------|
| Dijkman et al, 2008   | HCoV NL63 and 229E           | ELISA                          | n/a               | Finds that majority of HCoV-NL63 seroconversion occurs before 3.5 years of age                                                                                |
| Severance et al, 2009 | HCoVs 229E, HKU1, NL63, OC43 | ELISA                          | Table 1           | Cross-sectional survey of children (10) and adults (96)                                                                                                       |
| Dijkman et al, 2012   | HCoVs 229E, HKU1, NL63, OC44 | ELISA                          | Table 1           | Longitudinal follow-up of 25 healthy infants from birth to 24 months                                                                                          |
| Müller et al, 2015    | MERS                         | ELISA IgG, IFA, neutralization | Supplement        | Cross-sectional serosurvey for MERS in Saudi Arabia from general population                                                                                   |
| Chan et al, 2004      | SARS                         | IgG (assay unclear)            | Text              | The authors attributed the seropositivity differences to some patients in the older age groups not available for convalescent blood sample (died/moved wards) |
| Falsey et al, 2002    | HCoV 229E and OC43           | EIA for IgG                    | n/a               | Respiratory infection hospitalization surveillance                                                                                                            |
| Sarateanu et al, 1980 | HCoV OC43                    | HI                             | Table 1           | Serosurveillance over 2 years in Hamburg, Germany                                                                                                             |
| Hovi et al, 1979      | HCoV OC43                    | CF, HI, RIA                    | n/a               | Serosurvey of CoV across age groups and assays                                                                                                                |
| Walsh et al, 2013     | HCoV 229E and OC43           | EIA                            | Table 2           | Seroincidence of three cohorts varying in age and health status                                                                                               |
| Gao et al, 2016       | Six HCoVs (incl SARS)        | ELISA/WB                       | n/a               | Examines cross-reactivity between HCoVs                                                                                                                       |
| Ukkonen et al, 1984   | HCoV OC43                    | CF                             | n/a               | Complement fixation antibody responses across 16 respiratory pathogens of 58,000+ patients and 8 years                                                        |
| Liang et al, 2013     | HCoV OC43                    | WB                             | Table 1           | HCoV exploration of N protein and immunoreactivity                                                                                                            |
| Cavallaro et al, 1971 | HCoV 229E                    | CF and neutralization          | Figures 2 & 3     | Population level surveillance of 229E already in place during a 229E outbreak in Tecumseh, Michigan                                                           |
| Monto et al, 1974     | HCoV OC43                    | HAI and CF                     | Tables 1 & 3      | Population level surveillance of OC43 already in place during a 229E outbreak in Tecumseh, Michigan                                                           |
| Degnah et al, 2020    | MERS                         | ELISA, ppNT, MNT               | Table 3           | Seroprevalence of MERS in Saudi Arabia indicating possible asymptomatic infections                                                                            |
| Zhou et al, 2013      | HCoV 229E, OC43, NL63, HKU1  | IFA for IgG and IgM            | Figures 3 & 4     | Serosurvey providing further evidence of early onset of first infection                                                                                       |
| Chan et al, 2009      | HCoV HKU1                    | anti-S ELISA+WB                | Figure 6          | Assay development and testing across CoV serum samples                                                                                                        |

|                     |                    |                                         |         |                                                             |
|---------------------|--------------------|-----------------------------------------|---------|-------------------------------------------------------------|
| Shao et al, 2007    | HCoV 229E and NL63 | ELISA                                   | Table 1 | Seroprevalence study among individuals <20 years old        |
| Cereda et al, 1986  | HCoV OC43 and 229E | indirect immuno-<br>peroxidase staining | n/a     | Seroprevalence among individuals hospitalized for any cause |
| Schmidt et al, 1986 | HCoV OC43 and 229E | ELISA IgG                               | Table 2 | Seroprevalence lower among adults in 10 families in Seattle |

**Supplementary Table 8. Estimated annual force of infection from digitized age-seroprevalence data for endemic HCoVs**

| Strain    | Author and year       | Annual force of infection (95% CI) |
|-----------|-----------------------|------------------------------------|
| HCoV-229E | Zhou et al, 2013      | 0.06 (0.03,0.10)                   |
|           | Shao et al, 2007      | 0.16 (0.09,0.26)                   |
|           | Severance et al, 2009 | 0.06 (0.04,0.09)                   |
|           | Cavallaro et al, 1971 | 0.01 (0.008,0.02)                  |
| HCoV-OC43 | Zhou et al, 2013      | 0.05 (0.03,0.09)                   |
|           | Severance et al, 2009 | 0.06 (0.04,0.09)                   |
|           | Sarateanu et al, 1980 | 0.03 (0.01,0.05)                   |
| HCoV-NL63 | Zhou et al, 2013      | 0.04 (0.02,0.08)                   |
|           | Shao et al, 2007      | 0.12 (0.09,0.16)                   |
|           | Severance et al, 2009 | 0.06 (0.04,0.09)                   |
| HCoV-HKU1 | Zhou et al, 2013      | 0.05 (0.02,0.08)                   |
|           | Severance et al, 2009 | 0.02 (0.01,0.03)                   |
|           | Chan et al, 2009      | 0.004 (0.003,0.006)                |

## **Supplementary Figure Titles**

Figure S1: **Cumulative proportion of patients that seroconverted**, digitised from four studies (Z. Yang et al. 2009c; P-R Hsueh et al. 2004e; X. Chen et al. 2004c; Zhao et al. 2020). Studies on SARS-CoV-1 did not provide information on severity of symptoms.

Figure S2: **Antibody time series reported in studies in units of optical density (OD)**. Some studies may report time series of different antibodies for the same patient. The plotting symbols indicate whether a measurement was above the cutoff for the assay being used, if reported in the study. Note that while these are plotted on the same axis, values may not necessarily be compared across studies as each may employ different scales.

Figure S3: **Antibody time series reported in studies in units of titers**. Some studies may report time series of different antibodies or using different assays for the same patient. The plotting symbols indicate whether a measurement was above the cutoff for the assay being used, if reported in the study. Some studies reported titers that were lower than or greater than some threshold value; those are here plotted at those values (e.g., for  $\geq 320$ , the value is assumed to be 320). Note that while these are plotted on the same axis, values may not necessarily be compared across studies as each may use different scales.

Figure S1.

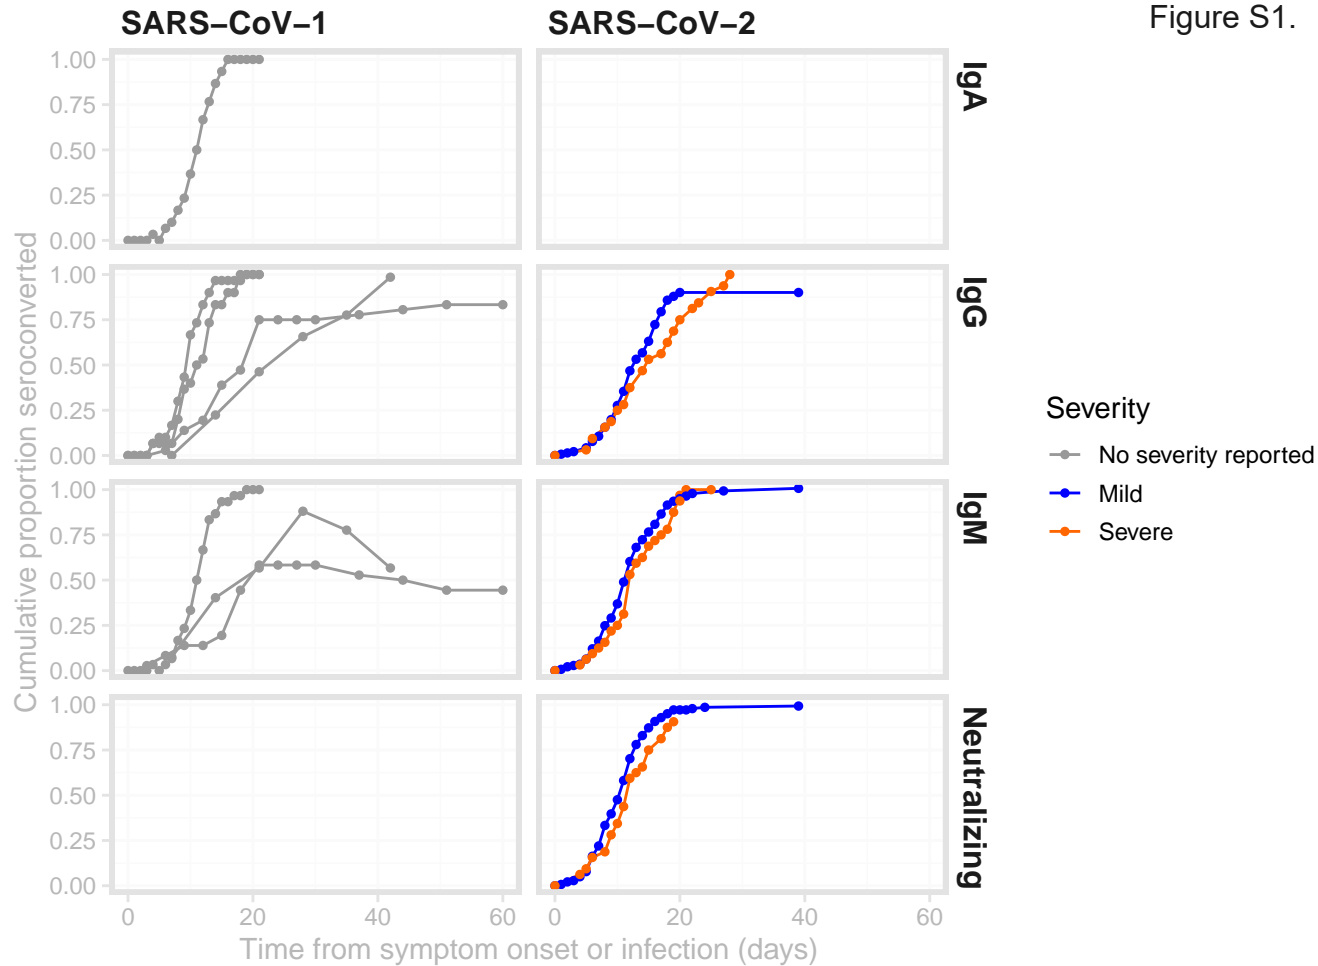

Figure S2.

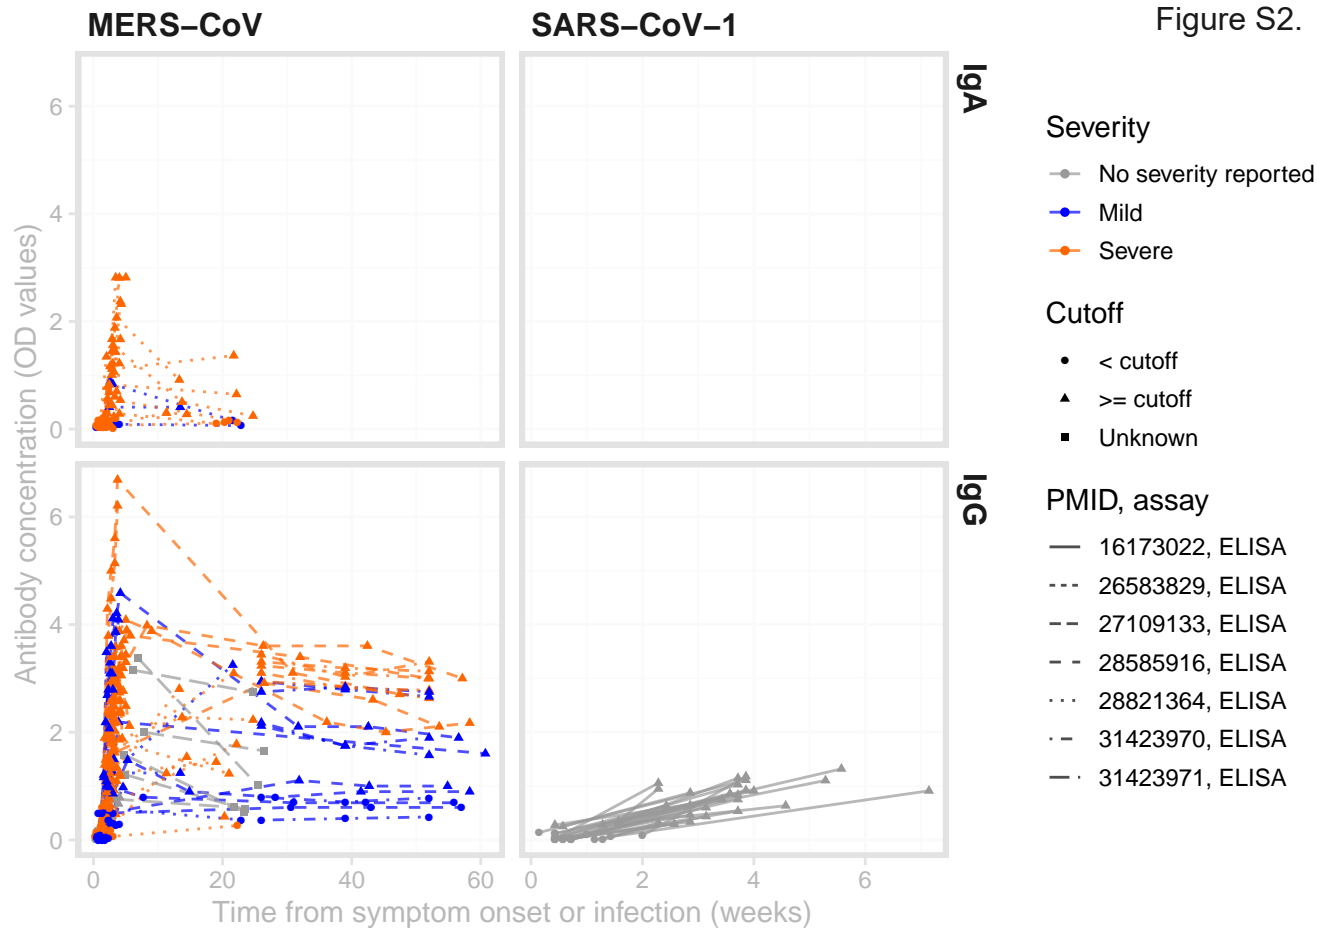

Figure S3.

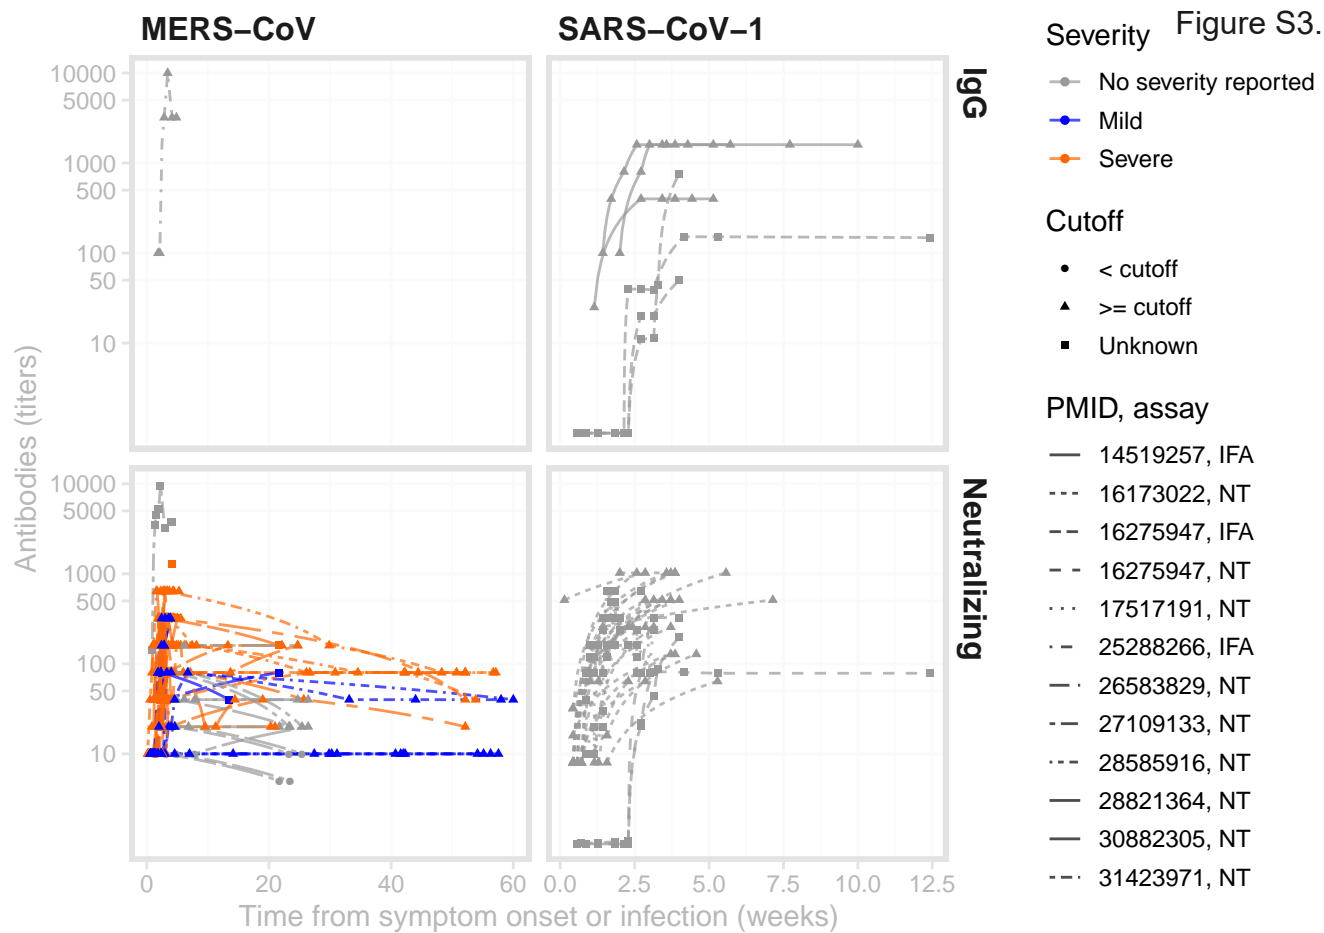

Supplement: 76926-2020.04.14.20065771-1.pdf [file 76926-2020.04.14.20065771-1.pdf]
